# Supplementary material for: Post-Authorization Safety Studies of Acute Liver Injury and Severe Complications of Urinary Tract Infection in Patients with Type 2 Diabetes Exposed to Dapagliflozin in a Real-World Setting
Source: PubMed Central journal article supplement — Drug Saf. 2022 Dec 30;46(2):175–93. doi: 10.1007/s40264-022-01262-4 (PMC9883309; doi:10.1007/s40264-022-01262-4), 2022-12-30
Supplement: 40264_2022_1262_MOESM1_ESM.pdf [file 40264_2022_1262_MOESM1_ESM.pdf]

# **Post-Authorization Safety Studies of Acute Liver Injury and Severe Complications of Urinary Tract Infection in Patients With Type 2 Diabetes Exposed to Dapagliflozin in a Real-World Setting**

Journal: *Drug Safety*

Heather E. Danysh, PhD<sup>1</sup> ([0000-0003-3014-7508](#)); Catherine B. Johannes, PhD<sup>1</sup> ([0000-0002-0586-9886](#)); Daniel C. Beachler, PhD<sup>2</sup> ([0000-0003-2788-3061](#)); J. Bradley Layton, PhD<sup>3</sup> ([0000-0003-0994-5820](#)); Ryan Ziemiecki, MS<sup>4</sup> ([0000-0002-1774-7034](#)); Alejandro Arana, MD<sup>5</sup> ([0000-0002-1593-3124](#)); Jade Dinh, MPH<sup>6</sup> ([0000-0003-0386-2776](#)); Ling Li, MSPH<sup>2</sup>; Brian Calingaert, MS<sup>3</sup> ([0000-0001-8177-6326](#)); Manel Pladevall-Vila, MD<sup>5,7</sup> ([0000-0002-9359-6055](#)); Phillip R. Hunt, ScD<sup>8</sup> ([0000-0002-9559-175X](#)); Hungta Chen, PhD<sup>8</sup>; Cecilia Karlsson, MD<sup>9</sup> ([0000-0002-4299-8775](#)); Kristina Johnsson, MD<sup>9</sup>; Alicia Gilsenan, PhD ([0000-0002-9266-1417](#))<sup>3</sup>

<sup>1</sup> Department of Pharmacoepidemiology and Risk Management, RTI Health Solutions, Waltham, MA, USA

<sup>2</sup> Department of Safety and Epidemiology, HealthCore, Inc., Wilmington, DE, USA

<sup>3</sup> Department of Pharmacoepidemiology and Risk Management, RTI Health Solutions, Research Triangle Park, NC, USA

<sup>4</sup> Department of Biostatistics, RTI Health Solutions, Research Triangle Park, NC, USA

<sup>5</sup> Department of Pharmacoepidemiology and Risk Management, RTI Health Solutions, Barcelona, Spain

<sup>6</sup> Department of Research Operations, HealthCore, Inc., Wilmington, DE, USA

<sup>7</sup> The Center for Health Policy and Health Services Research, Henry Ford Health System, Detroit, MI, USA

<sup>8</sup> BioPharmaceuticals Business Unit, AstraZeneca, Gaithersburg, MD, USA

<sup>9</sup> BioPharmaceuticals R&D, AstraZeneca, Gothenburg, Sweden

**Corresponding Author:**

Heather E. Danysh

Department of Pharmacoepidemiology and Risk Management

RTI Health Solutions

307 Waverley Oaks Road, Suite 101

Waltham, MA 02452-8413

Telephone: +1.781.434.1772

Email: [hdanysh@rti.org](mailto:hdanysh@rti.org)

# Online Resource 1

## TABLE OF CONTENTS

|                                                                                                                                         |           |
|-----------------------------------------------------------------------------------------------------------------------------------------|-----------|
| <b>LIST OF TABLES .....</b>                                                                                                             | <b>3</b>  |
| <b>LIST OF FIGURES.....</b>                                                                                                             | <b>3</b>  |
| <b>1 METHODS AND RESULTS.....</b>                                                                                                       | <b>33</b> |
| 1.1 Treatment Episodes .....                                                                                                            | 33        |
| 1.1.1 Primary Exposure.....                                                                                                             | 33        |
| 1.1.2 Comparator Exposure.....                                                                                                          | 33        |
| 1.2 Propensity Score Modeling Approach.....                                                                                             | 36        |
| 1.3 Estimation of Pooled Adjusted Incidence Rate Ratio .....                                                                            | 37        |
| 1.4 Assessment of the Potential Effect of Unmeasured Confounders (Quantitative Bias Analysis Methods, Results, and Interpretation)..... | 37        |
| 1.4.1 Hospitalization for Acute Liver Injury .....                                                                                      | 38        |
| 1.4.2 Severe Complications of Urinary Tract Infection.....                                                                              | 40        |
| 1.5 Definitions for Index Therapy Type Categories.....                                                                                  | 42        |
| <b>2 REFERENCES.....</b>                                                                                                                | <b>43</b> |

## LIST OF TABLES

|                                                                                                                                                                                           |    |
|-------------------------------------------------------------------------------------------------------------------------------------------------------------------------------------------|----|
| Table S1. Results of the Cohort Selection Process to Assess Hospitalization for Acute Liver Injury: Counts of Treatment Episodes After Exclusions and Final Matched Cohorts .....         | 5  |
| Table S2. Drugs With Known Association With Liver Injury, Included as Covariate Medications in Analysis to Assess Hospitalization for Acute Liver Injury .....                            | 7  |
| Table S3. Selected Baseline Characteristics of Cohorts to Assess Hospitalization for Acute Liver Injury, After Propensity Score Trimming .....                                            | 8  |
| Table S4. Results of the Cohort Selection Process to Assess Severe Complications of Urinary Tract Infection: Counts of Treatment Episodes After Exclusions and Final Matched Cohorts..... | 11 |
| Table S5. Selected Baseline Characteristics of Cohorts to Assess Severe Complications of Urinary Tract Infection, After Propensity Score Trimming.....                                    | 13 |

## LIST OF FIGURES

|                                                                                                                                                                                                                                                      |    |
|------------------------------------------------------------------------------------------------------------------------------------------------------------------------------------------------------------------------------------------------------|----|
| Figure S1. Balance of Covariates <sup>a</sup> in the Cohorts to Assess Hospitalization for Acute Liver Injury, Full Cohort Before Propensity Score Trimming and Within Propensity Score Strata After Trimming, by Data Source.....                   | 18 |
| Figure S2. Adjusted Incidence Rate Ratios for Hospitalization for Acute Liver Injury, Sensitivity Analyses Compared With the Primary Results.....                                                                                                    | 22 |
| Figure S3. Balance of Covariates <sup>a</sup> in the Cohorts to Assess Severe Complications of Urinary Tract Infection, Full Cohort Before Propensity Score Trimming and Within Propensity Score Strata After Trimming, by Sex and Data Source ..... | 23 |

|            |                                                                                                                                                                                                                  |    |
|------------|------------------------------------------------------------------------------------------------------------------------------------------------------------------------------------------------------------------|----|
| Figure S4. | Adjusted Incidence Rate Ratios for Severe Complications of Urinary Tract Infection, Sensitivity Analyses Compared With the Primary Results, by Sex....                                                           | 31 |
| Figure S5. | Eligible Comparator GLD Treatment Episodes Available for Selection into the Study Analysis .....                                                                                                                 | 35 |
| Figure S6. | Example of Patient Contributing Person-time to the Comparator GLD Group and the Dapagliflozin Group.....                                                                                                         | 36 |
| Figure S7. | Sensitivity Analysis, Adjusted Incidence Rate Ratios for hALI Under Varying Assumptions of Unmeasured Confounding Compared With the Observed Incidence Rate Ratio Estimate From the Pooled Analysis.....         | 38 |
| Figure S8. | Sensitivity Analysis, Adjusted Incidence Rate Ratios for sUTI Under Varying Assumptions of Unmeasured Confounding Compared With the Observed Incidence Rate Ratio Estimate From the Pooled Analysis, by Sex..... | 40 |

## PART A. SUPPLEMENTAL TABLES AND FIGURES

**Table S1. Results of the Cohort Selection Process to Assess Hospitalization for Acute Liver Injury: Counts of Treatment Episodes After Exclusions and Final Matched Cohorts**

| Type of exclusion                                                                                                     | CPRD          |            | HIRD          |            | Medicare          |            |
|-----------------------------------------------------------------------------------------------------------------------|---------------|------------|---------------|------------|-------------------|------------|
|                                                                                                                       | Dapagliflozin | Comparator | Dapagliflozin | Comparator | Dapagliflozin     | Comparator |
|                                                                                                                       |               | GLD        |               | GLD        |                   | GLD        |
| <i>Total number of potential treatment episodes during the study period</i>                                           | 14,881        | 114,639    | 46,581        | 1,014,001  | 50,262            | 2,424,555  |
| CPRD-only exclusions:                                                                                                 |               |            |               |            |                   |            |
| Prior to practice up-to-standard date                                                                                 | 0             | 0          | NA            | NA         | NA                | NA         |
| Aged < 18 years                                                                                                       | 0             | 25         | NA            | NA         | NA                | NA         |
| < 180 days of lookback                                                                                                | 893           | 14,343     | NA            | NA         | NA                | NA         |
| HIRD-only exclusions:                                                                                                 |               |            |               |            |                   |            |
| Aged < 18 or ≥ 65 years                                                                                               | NA            | NA         | 4,663         | 215,794    | NA                | NA         |
| < 180 days of lookback                                                                                                | NA            | NA         | 7,963         | 269,275    | NA                | NA         |
| Medicare-only exclusions:                                                                                             |               |            |               |            |                   |            |
| Aged < 65 years                                                                                                       | NA            | NA         | NA            | NA         | 1,178             | 47,798     |
| Enrolled because of disability or end-stage renal disease                                                             | NA            | NA         | NA            | NA         | ~ 20 <sup>a</sup> | 9,661      |
| Not a resident of a US state or District of Columbia at the index date                                                | NA            | NA         | NA            | NA         | 41                | 4,992      |
| < 6 months of enrollment                                                                                              | NA            | NA         | NA            | NA         | 15,554            | 828,088    |
| Index date coincided with the last date meeting Medicare enrollment criteria (i.e., patient had no follow-up time)    | NA            | NA         | NA            | NA         | < 11 <sup>b</sup> | 394        |
| <i>Potential treatment episodes meeting the inclusion criteria after applying the data source-specific exclusions</i> | 13,988        | 100,271    | 33,955        | 528,932    | 33,470            | 1,533,622  |

| Type of exclusion                                                                                                 | CPRD              |        | HIRD          |         | Medicare      |           |
|-------------------------------------------------------------------------------------------------------------------|-------------------|--------|---------------|---------|---------------|-----------|
|                                                                                                                   | Comparator        |        | Comparator    |         | Comparator    |           |
|                                                                                                                   | Dapagliflozin     | GLD    | Dapagliflozin | GLD     | Dapagliflozin | GLD       |
| Diagnosis of type 1 diabetes mellitus on or before the index date                                                 | 677               | 3,411  | 3,347         | 40,925  | 2,941         | 141,937   |
| Dapagliflozin use before the study period                                                                         | 0                 | 0      | 0             | 0       | 0             | 0         |
| Other SGLT2 inhibitor medication use on or before the index date                                                  | 174               | 12,039 | 6,952         | 142,609 | 5,132         | 215,909   |
| Comparator GLD use starts during dapagliflozin exposure period                                                    | 0                 | 11     | NA            | 7,207   | 0             | 5,713     |
| <i>Potential treatment episodes meeting the inclusion criteria after applying the diabetes-related exclusions</i> | 13,137            | 84,810 | 23,656        | 337,226 | 25,397        | 1,170,063 |
| Acute liver injury                                                                                                | 712               | 4,744  | 512           | 7,516   | 1,245         | 50,783    |
| Chronic liver disease or alcoholism                                                                               | 898               | 5,725  | 4,494         | 65,767  | 7,084         | 365,527   |
| Chronic or acute hepatitis                                                                                        | ~ 95 <sup>a</sup> | 508    | 109           | 1,907   | 219           | 7,906     |
| Chronic or acute disease of the gallbladder or pancreas                                                           | 725               | 4,968  | 770           | 11,353  | 1,333         | 76,687    |
| Hepatic, biliary or pancreatic cancer                                                                             | < 5 <sup>c</sup>  | 69     | NR            | 146     | 29            | 1,556     |
| Heart failure                                                                                                     | 223               | 3,792  | 580           | 10,570  | 2,207         | 130,233   |
| <i>Final number of treatment episodes eligible for cohort selection</i>                                           | 10,478            | 65,004 | 17,187        | 239,967 | 13,280        | 537,371   |
| <i>Final number of treatment episodes selected into the cohort<sup>d</sup></i>                                    | 10,466            | 39,173 | 17,187        | 195,393 | 13,280        | 199,193   |

CMS = Center for Medicare and Medicaid Services; GLD = glucose lowering drug; NA = not applicable; SGLT2 = sodium-glucose cotransporter 2; US = United States.

<sup>a</sup> Approximate value reported to prevent the derivation of unreportable values in other cells.

<sup>b</sup> According to CMS policy, any cell with a value of 1 to 10 cannot be reported.

<sup>c</sup> According to CPRD policy, any cell with a value of 1 to 4 cannot be reported.

<sup>d</sup> Final number of treatment episodes selected after matching and before propensity score trimming.

**Table S2. Drugs With Known Association With Liver Injury, Included as Covariate Medications in Analysis to Assess Hospitalization for Acute Liver Injury**

|                               |                     |                               |
|-------------------------------|---------------------|-------------------------------|
| Acarbose                      | Enalapril           | Phenobarbital                 |
| Acetaminophen (prescription)  | Erythromycins       | Phenothiazines                |
| Allopurinol                   | Estrogens           | Phenytoin                     |
| Amiodarone                    | Fluoxetine          | Pyrazinamide                  |
| Amitriptyline                 | Flutamide           | Rifampicin                    |
| Amoxicillin + clavulanic acid | HAART drugs         | Risperidone                   |
| Anabolic steroids             | Irbesartan          | Sertraline                    |
| Aripiprazole                  | Isoniazid           | Statins                       |
| Azathioprine                  | Ketoconazole        | Sulfonamides                  |
| Baclofen                      | Lamotrigine         | Terbinafine                   |
| Bupropion                     | Lisinopril          | Tetracyclines                 |
| Captopril                     | Losartan            | Trazodone                     |
| Carbamazepine                 | Methotrexate        | Tricyclics                    |
| Chlorpromazine                | Mirtazapine         | Trimethoprim-sulfamethoxazole |
| Ciprofloxacin                 | Nitrofurantoin      | Valproic acid                 |
| Clindamycin                   | NSAIDs              | Verapamil                     |
| Clopidogrel                   | Omeprazole          |                               |
| Cyproheptadine                | Oral contraceptives |                               |
| Duloxetine                    | Paroxetine          |                               |

HAART = highly active antiretroviral therapy; NSAID = nonsteroidal anti-inflammatory drug.

**Table S3. Selected Baseline Characteristics of Cohorts to Assess Hospitalization for Acute Liver Injury, After Propensity Score Trimming**

|                                                                                  | CPRD                         |                                   | HIRD                          |                                    | Medicare                      |                                    |
|----------------------------------------------------------------------------------|------------------------------|-----------------------------------|-------------------------------|------------------------------------|-------------------------------|------------------------------------|
|                                                                                  | Dapagliflozin<br>(n = 9,027) | Comparator<br>GLD<br>(n = 32,455) | Dapagliflozin<br>(n = 15,217) | Comparator<br>GLD<br>(n = 175,107) | Dapagliflozin<br>(n = 11,332) | Comparator<br>GLD<br>(n = 172,986) |
| Age, mean (SD), <sup>a</sup> years                                               | 57.6 (10.6)                  | 58.5 (10.9)                       | 51.5 (8.7)                    | 51.6 (8.8)                         | 69.8 (4.4)                    | 69.8 (4.5)                         |
| Female sex, n (%)                                                                | 3,663 (40.6)                 | 13,073 (40.3)                     | 6,747 (44.3)                  | 77,963 (44.5)                      | 5,350 (47.2)                  | 81,418 (47.1)                      |
| Race/ethnicity, <sup>b</sup> n (%)                                               |                              |                                   |                               |                                    |                               |                                    |
| Asian                                                                            | NA                           | NA                                | NA                            | NA                                 | 462 (4.1)                     | 6,914 (4.0)                        |
| Black                                                                            | NA                           | NA                                | NA                            | NA                                 | 781 (6.9)                     | 13,828 (8.0)                       |
| Hispanic                                                                         | NA                           | NA                                | NA                            | NA                                 | 448 (4.0)                     | 6,704 (3.9)                        |
| White                                                                            | NA                           | NA                                | NA                            | NA                                 | 9,041 (79.8)                  | 135,881 (78.6)                     |
| Other <sup>c</sup>                                                               | NA                           | NA                                | NA                            | NA                                 | 274 (2.4)                     | 4,709 (2.7)                        |
| Unknown                                                                          | NA                           | NA                                | NA                            | NA                                 | 326 (2.9)                     | 4,950 (2.9)                        |
| Insulin use at the index date, n (%)                                             | 954 (10.6)                   | 1,706 (5.3)                       | 2,053 (13.5)                  | 19,462 (11.1)                      | 1,840 (16.2)                  | 23,290 (13.5)                      |
| One or more drugs with a known association with liver injury, <sup>d</sup> n (%) | 8,275 (91.7)                 | 29,316 (90.3)                     | 13,306 (87.4)                 | 151,279 (86.4)                     | 9,226 (81.4)                  | 143,614 (83.0)                     |
| Indicators of diabetes severity, n (%)                                           |                              |                                   |                               |                                    |                               |                                    |
| Diabetic nephropathy or renal insufficiency                                      | 88 (1.0)                     | 310 (1.0)                         | 280 (1.8)                     | 3,745 (2.1)                        | 729 (6.4)                     | 14,874 (8.6)                       |
| Retinopathy                                                                      | 2,566 (28.4)                 | 8,329 (25.7)                      | 3,516 (23.1)                  | 36,845 (21.0)                      | 3,845 (33.9)                  | 52,059 (30.1)                      |
| Peripheral neuropathy                                                            | 256 (2.8)                    | 832 (2.6)                         | 250 (1.6)                     | 2,647 (1.5)                        | 462 (4.1)                     | 7,147 (4.1)                        |
| Peripheral vascular disease <sup>e</sup>                                         | 292 (3.2)                    | 1,067 (3.3)                       | 3,317 (21.8)                  | 35,228 (20.1)                      | 3,560 (31.4)                  | 50,341 (29.1)                      |
| Coronary heart disease                                                           | 1,043 (11.6)                 | 3,969 (12.2)                      | 1,082 (7.1)                   | 12,753 (7.3)                       | 2,516 (22.2)                  | 37,311 (21.6)                      |
| Cerebrovascular disease                                                          | 391 (4.3)                    | 1,714 (5.3)                       | 196 (1.3)                     | 2,583 (1.5)                        | 991 (8.7)                     | 15,150 (8.8)                       |
| Amputation                                                                       | 70 (0.8)                     | 280 (0.9)                         | 42 (0.3)                      | 702 (0.4)                          | 45 (0.4)                      | 1,129 (0.7)                        |
| Body mass index (kg/m <sup>2</sup> ), <sup>f</sup> n (%)                         |                              |                                   |                               |                                    |                               |                                    |
| < 20 (underweight)                                                               | 16 (0.2)                     | 101 (0.3)                         | NA                            | NA                                 | NA                            | NA                                 |



|                                                                                                 | CPRD                         |                                   | HIRD                          |                                    | Medicare                      |                                    |
|-------------------------------------------------------------------------------------------------|------------------------------|-----------------------------------|-------------------------------|------------------------------------|-------------------------------|------------------------------------|
|                                                                                                 | Dapagliflozin<br>(n = 9,027) | Comparator<br>GLD<br>(n = 32,455) | Dapagliflozin<br>(n = 15,217) | Comparator<br>GLD<br>(n = 175,107) | Dapagliflozin<br>(n = 11,332) | Comparator<br>GLD<br>(n = 172,986) |
| 20 to < 25 (normal)                                                                             | 299 (3.3)                    | 1,624 (5.0)                       | NA                            | NA                                 | NA                            | NA                                 |
| 25 to < 30 (overweight)                                                                         | 1,982 (22.0)                 | 8,560 (26.4)                      | NA                            | NA                                 | NA                            | NA                                 |
| 30 to < 40 (obese)                                                                              | 4,932 (54.6)                 | 16,576 (51.1)                     | NA                            | NA                                 | NA                            | NA                                 |
| ≥ 40 (severely obese)                                                                           | 1,648 (18.3)                 | 4,861 (15.0)                      | NA                            | NA                                 | NA                            | NA                                 |
| Unknown                                                                                         | 150 (1.7)                    | 733 (2.3)                         | NA                            | NA                                 | NA                            | NA                                 |
| Healthcare utilization in the 180 days before the index date                                    |                              |                                   |                               |                                    |                               |                                    |
| No. of outpatient visits, <sup>g</sup> n (%)                                                    |                              |                                   |                               |                                    |                               |                                    |
| 0                                                                                               | 407 (4.5)                    | 1,297 (4.0)                       | 249 (1.6)                     | 4,282 (2.4)                        | 681 (6.0)                     | 11,624 (6.7)                       |
| 1                                                                                               | 791 (8.8)                    | 2,777 (8.6)                       | 646 (4.2)                     | 8,571 (4.9)                        | 809 (7.1)                     | 13,600 (7.9)                       |
| 2 or more                                                                                       | 7,829 (86.7)                 | 28,381 (87.4)                     | 14,322 (94.1)                 | 162,254 (92.7)                     | 9,842 (86.9)                  | 147,762 (85.4)                     |
| No. of hospitalizations, n (%)                                                                  |                              |                                   |                               |                                    |                               |                                    |
| 0                                                                                               | 8,275 (91.7)                 | 29,497 (90.9)                     | 14,852 (97.6)                 | 169,744 (96.9)                     | 10,980 (96.9)                 | 166,156 (96.1)                     |
| 1                                                                                               | 565 (6.3)                    | 2,118 (6.5)                       | 333 (2.2)                     | 4,872 (2.8)                        | 290 (2.6)                     | 5,447 (3.1)                        |
| 2 or more                                                                                       | 187 (2.1)                    | 840 (2.6)                         | 32 (0.2)                      | 491 (0.3)                          | 62 (0.5)                      | 1,383 (0.8)                        |
| No. of GLD classes <sup>h</sup> used within 12 months <sup>i</sup> before the index date, n (%) |                              |                                   |                               |                                    |                               |                                    |
| 0                                                                                               | 73 (0.8)                     | 486 (1.5)                         | 2,227 (14.6)                  | 31,885 (18.2)                      | 757 (6.7)                     | 15,181 (8.8)                       |
| 1-2                                                                                             | 6,100 (67.6)*                | 27,969 (86.2)*                    | 11,016 (72.4)                 | 131,099 (74.9)                     | 7,220 (63.7)*                 | 127,377 (73.6)*                    |
| 3-4                                                                                             | 2,825 (31.3)*                | 3,956 (12.2)*                     | 1,965 (12.9)                  | 12,105 (6.9)                       | 3,342 (29.5)*                 | 30,263 (17.5)*                     |
| 5-8                                                                                             | 29 (0.3)                     | 44 (0.1)                          | NR                            | 18 (< 0.1)                         | 13 (0.1)                      | 165 (0.1)                          |
| Type of index therapy, <sup>j</sup> n (%)                                                       |                              |                                   |                               |                                    |                               |                                    |
| Index monotherapy with no prior treatment                                                       | 184 (2.0)                    | 566 (1.7)                         | 1,276 (8.4)                   | 15,622 (8.9)                       | 1,175 (10.4)                  | 12,930 (7.5)                       |
| Combined index therapy with no prior treatment                                                  | 129 (1.4)                    | 860 (2.6)                         | 1,188 (7.8)                   | 18,303 (10.5)                      | 606 (5.3)                     | 18,360 (10.6)                      |

|                                      | CPRD                         |                                   | HIRD                          |                                    | Medicare                      |                                    |
|--------------------------------------|------------------------------|-----------------------------------|-------------------------------|------------------------------------|-------------------------------|------------------------------------|
|                                      | Dapagliflozin<br>(n = 9,027) | Comparator<br>GLD<br>(n = 32,455) | Dapagliflozin<br>(n = 15,217) | Comparator<br>GLD<br>(n = 175,107) | Dapagliflozin<br>(n = 11,332) | Comparator<br>GLD<br>(n = 172,986) |
| Add-on index therapy                 | 5,591 (61.9)                 | 23,021 (70.9)                     | 10,162 (66.8)                 | 110,058 (62.9)                     | 6,417 (56.6)                  | 92,689 (53.6)                      |
| Switched-to index therapy            | 354 (3.9)                    | 2,153 (6.6)                       | 330 (2.2)                     | 3,379 (1.9)                        | 817 (7.2)                     | 15,383 (8.9)                       |
| Add-on and switched-to index therapy | 2,451 (27.2)*                | 4,783 (14.7)*                     | 1,208 (7.9)                   | 9,229 (5.3)                        | 1,719 (15.2)                  | 24,663 (14.3)                      |
| Nonevaluable <sup>k</sup>            | 318 (3.5)                    | 1,072 (3.3)                       | 1,053 (6.9)                   | 18,516 (10.6)                      | 598 (5.3)                     | 8,961 (5.2)                        |

CPRD = Clinical Practice Research Datalink; GLD = glucose-lowering drug; HIRD = HealthCore Integrated Research Database; NA = not applicable; SD = standard deviation.

\* Absolute standardized difference (StDiff) > 0.20.

<sup>a</sup> Patients were aged 18 years or older in CPRD, 18-64 years in the HIRD, and 65 years or older in Medicare.

<sup>b</sup> Data on race/ethnicity were available only in Medicare.

<sup>c</sup> Includes patients categorized as Other or North American Native in Medicare.

<sup>d</sup> Drugs with a known association with liver injury are listed in Table S2.

<sup>e</sup> Includes peripheral artery disease.

<sup>f</sup> Data on body mass index were available only in CPRD.

<sup>g</sup> Outpatient visits included general practitioner and outpatient hospital visits.

<sup>h</sup> Glucose-lowering drug classes that were considered were insulin, sulfonylureas, thiazolidinediones, dipeptidyl peptidase-4 (DPP-4) inhibitors, glucagon-like peptide-1 (GLP-1) receptor agonists, biguanides (metformin), alpha glucosidase inhibitors, and meglitinides.

<sup>i</sup> Those with at least 180 days of available lookback data before the index date were eligible for inclusion in the study, and therefore some patients had less than 12 months of available lookback data.

<sup>j</sup> Detailed definitions for the index therapy type categories are provided in Section 1.5.

<sup>k</sup> Patients who did not have sufficient follow-up time to assess the 90-day add-on/switch requirement.

**Table S4. Results of the Cohort Selection Process to Assess Severe Complications of Urinary Tract Infection: Counts of Treatment Episodes After Exclusions and Final Matched Cohorts**

| Type of exclusion                                                                                                     | CPRD          |                   | HIRD          |                   | Medicare          |                   |
|-----------------------------------------------------------------------------------------------------------------------|---------------|-------------------|---------------|-------------------|-------------------|-------------------|
|                                                                                                                       | Dapagliflozin | Comparator<br>GLD | Dapagliflozin | Comparator<br>GLD | Dapagliflozin     | Comparator<br>GLD |
| <i>Total number of potential treatment episodes during the study period</i>                                           | 14,881        | 114,639           | 46,581        | 1,014,001         | 50,262            | 2,424,555         |
| CPRD-only exclusions:                                                                                                 |               |                   |               |                   |                   |                   |
| Prior to practice up-to-standard date                                                                                 | 0             | 0                 | NA            | NA                | NA                | NA                |
| Aged < 18 years                                                                                                       | 0             | 25                | NA            | NA                | NA                | NA                |
| < 180 days of lookback                                                                                                | 893           | 14,343            | NA            | NA                | NA                | NA                |
| HIRD-only exclusions:                                                                                                 |               |                   |               |                   |                   |                   |
| Aged < 18 or ≥ 65 years                                                                                               | NA            | NA                | 4,663         | 215,794           | NA                | NA                |
| < 180 days of lookback                                                                                                | NA            | NA                | 7,963         | 269,275           | NA                | NA                |
| Medicare-only exclusions:                                                                                             |               |                   |               |                   |                   |                   |
| Aged < 65 years                                                                                                       | NA            | NA                | NA            | NA                | 1,178             | 47,798            |
| Enrolled because of disability or end-stage renal disease                                                             | NA            | NA                | NA            | NA                | ~ 20 <sup>a</sup> | 9,661             |
| Not a resident of a US state or District of Columbia at the index date                                                | NA            | NA                | NA            | NA                | 41                | 4,992             |
| < 6 months of enrollment                                                                                              | NA            | NA                | NA            | NA                | 15,554            | 828,088           |
| Index date coincided with the last date meeting Medicare enrollment criteria (i.e., patient has no follow-up time)    | NA            | NA                | NA            | NA                | < 11 <sup>b</sup> | 394               |
| <i>Potential treatment episodes meeting the inclusion criteria after applying the data source-specific exclusions</i> | 13,988        | 100,271           | 33,955        | 528,932           | 33,470            | 1,533,622         |
| Diagnosis of type 1 diabetes mellitus on or before the index date                                                     | 677           | 3,411             | 3,347         | 40,925            | 2,941             | 141,937           |

| Type of exclusion                                                                                                 | CPRD          |            | HIRD              |            | Medicare      |            |
|-------------------------------------------------------------------------------------------------------------------|---------------|------------|-------------------|------------|---------------|------------|
|                                                                                                                   | Dapagliflozin | Comparator | Dapagliflozin     | Comparator | Dapagliflozin | Comparator |
|                                                                                                                   |               | GLD        |                   | GLD        |               | GLD        |
| Dapagliflozin use before the study period                                                                         | 0             | 0          | 0                 | 0          | 0             | 0          |
| Other SGLT2 inhibitor medication use on or before the index date                                                  | 174           | 12,039     | 6,952             | 142,609    | 5,132         | 215,909    |
| Comparator GLD use starts during dapagliflozin exposure period                                                    | 0             | 11         | 0                 | 7,207      | 0             | 5,713      |
| <i>Potential treatment episodes meeting the inclusion criteria after applying the diabetes-related exclusions</i> | 13,137        | 84,810     | 23,656            | 337,226    | 25,397        | 1,170,063  |
| Chronic pyelonephritis                                                                                            | 10            | 92         | < 11 <sup>c</sup> | 295        | 53            | 2,944      |
| <b>Females</b>                                                                                                    |               |            |                   |            |               |            |
| <i>Final number of treatment episodes eligible for cohort selection</i>                                           | 5,510         | 36,276     | 10,551            | 158,833    | 12,561        | 618,885    |
| <i>Final number of treatment episodes selected into the cohort<sup>d</sup></i>                                    | 5,508         | 20,807     | 10,544            | 124,755    | 12,561        | 188,415    |
| <b>Males</b>                                                                                                      |               |            |                   |            |               |            |
| <i>Final number of treatment episodes eligible for cohort selection</i>                                           | 7,617         | 48,442     | 13,095            | 178,098    | 12,783        | 548,234    |
| <i>Final number of treatment episodes selected into the cohort<sup>d</sup></i>                                    | 7,610         | 29,195     | 13,091            | 147,737    | 12,783        | 191,736    |

CMS = Center for Medicare and Medicaid Services; CPRD = Clinical Practice Research Datalink; GLD = glucose-lowering drug; HIRD = HealthCore Integrated Research Database;

NA = not applicable; SGLT2 = sodium-glucose cotransporter 2; US = United States.

<sup>a</sup> Approximate value reported to prevent the derivation of unreportable values in other cells.

<sup>b</sup> According to CMS policy, any cell with a value of 1 to 10 cannot be reported.

<sup>c</sup> According to HIRD policy, any cell with a value of 1 to 10 cannot be reported.

<sup>d</sup> Final number of treatment episodes selected into the cohort after matching and before propensity score trimming.

**Table S5. Selected Baseline Characteristics of Cohorts to Assess Severe Complications of Urinary Tract Infection, After Propensity Score Trimming**

|                                                      | CPRD             |                   | HIRD             |                    | Medicare          |                    |
|------------------------------------------------------|------------------|-------------------|------------------|--------------------|-------------------|--------------------|
|                                                      | Dapagliflozin    | Comparator<br>GLD | Dapagliflozin    | Comparator<br>GLD  | Dapagliflozin     | Comparator<br>GLD  |
| <b>Females</b>                                       | <b>n = 4,764</b> | <b>n = 17,901</b> | <b>n = 9,413</b> | <b>n = 111,587</b> | <b>n = 10,653</b> | <b>n = 163,262</b> |
| Age, mean (SD), <sup>a</sup> years                   | 57.0 (11.1)      | 58.4 (11.3)       | 51.6 (8.8)       | 51.5 (9.1)         | 71.7 (5.8)        | 71.7 (5.8)         |
| Race/ethnicity, <sup>b</sup> n (%)                   |                  |                   |                  |                    |                   |                    |
| Asian                                                | NA               | NA                | NA               | NA                 | 725 (6.8)         | 8,458 (5.2)        |
| Black                                                | NA               | NA                | NA               | NA                 | 930 (8.7)         | 17,401 (10.7)      |
| Hispanic                                             | NA               | NA                | NA               | NA                 | 554 (5.2)         | 7,596 (4.7)        |
| White                                                | NA               | NA                | NA               | NA                 | 8,003 (75.1)      | 122,314 (74.9)     |
| Other <sup>c</sup>                                   | NA               | NA                | NA               | NA                 | 263 (2.5)         | 5,052 (3.1)        |
| Unknown                                              | NA               | NA                | NA               | NA                 | 178 (1.7)         | 2,441 (1.5)        |
| Insulin use at the index date, n (%)                 | 535 (11.2)       | 1,072 (6.0)       | 1,355 (14.4)     | 13,472 (12.1)      | 1,899 (17.8)      | 25,000 (15.3)      |
| Kidney diseases, all types, acute and chronic, n (%) | 406 (8.5)        | 2,166 (12.1)      | 418 (4.4)        | 5,579 (5.0)        | 1,849 (17.4)      | 34,065 (20.9)      |
| Urinary infections (chronic or recurring), n (%)     | 217 (4.6)        | 833 (4.7)         | 1,051 (11.2)     | 12,944 (11.6)      | 2,706 (25.4)      | 42,013 (25.7)      |
| Indicators of diabetes severity, n (%)               |                  |                   |                  |                    |                   |                    |
| Diabetic nephropathy or renal insufficiency          | 33 (0.7)         | 108 (0.6)         | 179 (1.9)        | 2,337 (2.1)        | 963 (9.0)         | 17,292 (10.6)      |
| Retinopathy                                          | 1,205 (25.3)     | 4,070 (22.7)      | 2,316 (24.6)     | 24,583 (22.0)      | 4,294 (40.3)      | 59,751 (36.6)      |
| Peripheral neuropathy                                | 137 (2.9)        | 485 (2.7)         | 204 (2.2)        | 2,197 (2.0)        | 768 (7.2)         | 12,172 (7.5)       |
| Peripheral vascular disease <sup>d</sup>             | 97 (2.0)         | 469 (2.6)         | 2,174 (23.1)     | 23,449 (21.0)      | 4,305 (40.4)      | 62,327 (38.2)      |
| Coronary heart disease                               | 357 (7.5)        | 1,549 (8.7)       | 667 (7.1)        | 8,009 (7.2)        | 3,171 (29.8)      | 46,806 (28.7)      |
| Cerebrovascular disease                              | 202 (4.2)        | 957 (5.3)         | 168 (1.8)        | 2,286 (2.0)        | 1,700 (16.0)      | 25,432 (15.6)      |
| Amputation                                           | 14 (0.3)         | 85 (0.5)          | 13 (0.1)         | 186 (0.2)          | 43 (0.4)          | 1,083 (0.7)        |

|                                                                                                 | CPRD          |                   | HIRD          |                   | Medicare      |                   |
|-------------------------------------------------------------------------------------------------|---------------|-------------------|---------------|-------------------|---------------|-------------------|
|                                                                                                 | Dapagliflozin | Comparator<br>GLD | Dapagliflozin | Comparator<br>GLD | Dapagliflozin | Comparator<br>GLD |
| Body mass index (kg/m <sup>2</sup> ), <sup>e</sup> n (%)                                        |               |                   |               |                   |               |                   |
| < 20 (underweight)                                                                              | 11 (0.2)      | 119 (0.7)         | NA            | NA                | NA            | NA                |
| 20 to < 25 (normal)                                                                             | 154 (3.2)     | 1,272 (7.1)       | NA            | NA                | NA            | NA                |
| 25 to < 30 (overweight)                                                                         | 794 (16.7)    | 3,748 (20.9)      | NA            | NA                | NA            | NA                |
| 30 to < 40 (obese)                                                                              | 2,462 (51.7)  | 8,553 (47.8)      | NA            | NA                | NA            | NA                |
| ≥ 40 (severely obese)                                                                           | 1,271 (26.7)  | 3,641 (20.3)      | NA            | NA                | NA            | NA                |
| Unknown                                                                                         | 72 (1.5)      | 568 (3.2)         | NA            | NA                | NA            | NA                |
| Healthcare utilization in the 180 days before the index date                                    |               |                   |               |                   |               |                   |
| No. of outpatient visits, <sup>f</sup> n (%)                                                    |               |                   |               |                   |               |                   |
| 0                                                                                               | 173 (3.6)     | 573 (3.2)         | 90 (1.0)      | 1,737 (1.6)       | 467 (4.4)     | 8,864 (5.4)       |
| 1                                                                                               | 303 (6.4)     | 1,113 (6.2)       | 249 (2.6)     | 3,381 (3.0)       | 568 (5.3)     | 9,936 (6.1)       |
| 2 or more                                                                                       | 4,288 (90.0)  | 16,215 (90.6)     | 9,074 (96.4)  | 106,469 (95.4)    | 9,618 (90.3)  | 144,462 (88.5)    |
| No. of hospitalizations, n (%)                                                                  |               |                   |               |                   |               |                   |
| 0                                                                                               | 4,272 (89.7)  | 15,871 (88.7)     | 9,103 (96.7)  | 106,866 (95.8)    | 10,001 (93.9) | 149,512 (91.6)    |
| 1                                                                                               | 352 (7.4)     | 1,366 (7.6)       | 272 (2.9)     | 4,135 (3.7)       | 443 (4.2)     | 8,998 (5.5)       |
| 2 or more                                                                                       | 140 (2.9)     | 664 (3.7)         | 38 (0.4)      | 586 (0.5)         | 209 (2.0)     | 4,752 (2.9)       |
| No. of GLD classes <sup>g</sup> used within 12 months <sup>h</sup> before the index date, n (%) |               |                   |               |                   |               |                   |
| 0                                                                                               | 42 (0.9)      | 382 (2.1)         | 1,398 (14.9)  | 21,299 (19.1)     | 700 (6.6)     | 13,435 (8.2)      |
| 1-2                                                                                             | 3,427 (71.9)* | 15,442 (86.3)*    | 6,962 (74.0)  | 83,046 (74.4)     | 6,949 (65.2)  | 121,122 (74.2)    |
| 3-4                                                                                             | 1,285 (27.0)* | 2,056 (11.5)*     | 1,049 (11.1)* | 7,230 (6.5)*      | 2,983 (28.0)* | 28,522 (17.5)*    |
| 5-8                                                                                             | 10 (0.2)      | 21 (0.1)          | NR            | 12 (< 0.1)        | 21 (0.2)      | 183 (0.1)         |
| Type of index therapy, <sup>i</sup> n (%)                                                       |               |                   |               |                   |               |                   |

|                                                      | CPRD             |                   | HIRD              |                    | Medicare          |                    |
|------------------------------------------------------|------------------|-------------------|-------------------|--------------------|-------------------|--------------------|
|                                                      | Dapagliflozin    | Comparator        | Dapagliflozin     | Comparator         | Dapagliflozin     | Comparator         |
|                                                      |                  | GLD               |                   | GLD                |                   | GLD                |
| Index monotherapy with no prior treatment            | 122 (2.6)        | 401 (2.2)         | 910 (9.7)         | 14,113 (12.6)      | 1,147 (10.8)      | 14,545 (8.9)       |
| Combined index therapy with no prior treatment       | 62 (1.3)         | 536 (3.0)         | 638 (6.8)         | 8,532 (7.6)        | 547 (5.1)         | 14,103 (8.6)       |
| Add-on index therapy                                 | 2,938 (61.7)     | 12,204 (68.2)     | 6,192 (65.8)      | 67,774 (60.7)      | 5,843 (54.8)      | 82,551 (50.6)      |
| Switched-to index therapy                            | 271 (5.7)        | 1,591 (8.9)       | 261 (2.8)         | 2,975 (2.7)        | 912 (8.6)         | 18,773 (11.5)      |
| Add-on and switched-to index therapy                 | 1,204 (25.3)*    | 2,553 (14.3)*     | 807 (8.6)         | 6,692 (6.0)        | 1,625 (15.3)      | 24,070 (14.7)      |
| Nonevaluable <sup>l</sup>                            | 167 (3.5)        | 616 (3.4)         | 605 (6.4)         | 11,501 (10.3)      | 579 (5.4)         | 9,220 (5.6)        |
| <b>Males</b>                                         | <b>n = 6,411</b> | <b>n = 23,768</b> | <b>n = 11,550</b> | <b>n = 132,196</b> | <b>n = 10,744</b> | <b>n = 164,580</b> |
| Age, mean (SD), <sup>a</sup> years                   | 58.0 (10.1)      | 58.5 (10.4)       | 52.0 (8.3)        | 52.1 (8.3)         | 71.3 (5.3)        | 71.3 (5.3)         |
| Race/ethnicity, <sup>b</sup> n (%)                   |                  |                   |                   |                    |                   |                    |
| Asian                                                | NA               | NA                | NA                | NA                 | 521 (4.8)         | 6,584 (4.0)        |
| Black                                                | NA               | NA                | NA                | NA                 | 520 (4.8)         | 11,184 (6.8)       |
| Hispanic                                             | NA               | NA                | NA                | NA                 | 317 (3.0)         | 4,963 (3.0)        |
| White                                                | NA               | NA                | NA                | NA                 | 8,750 (81.4)      | 131,270 (79.8)     |
| Other <sup>c</sup>                                   | NA               | NA                | NA                | NA                 | 308 (2.9)         | 5,556 (3.4)        |
| Unknown                                              | NA               | NA                | NA                | NA                 | 328 (3.1)         | 5,023 (3.1)        |
| Insulin use at the index date, n (%)                 | 683 (10.7)       | 1,314 (5.5)       | 1,592 (13.8)      | 15,261 (11.5)      | 1,799 (16.7)      | 23,446 (14.2)      |
| Kidney diseases, all types, acute and chronic, n (%) | 433 (6.8)        | 2,010 (8.5)       | 583 (5.0)         | 7,978 (6.0)        | 2,098 (19.5)      | 37,611 (22.9)      |
| Urinary infections (chronic or recurring), n (%)     | 85 (1.3)         | 331 (1.4)         | 298 (2.6)         | 3,525 (2.7)        | 1,089 (10.1)      | 16,151 (9.8)       |
| Indicators of diabetes severity, n (%)               |                  |                   |                   |                    |                   |                    |
| Diabetic nephropathy or renal insufficiency          | 75 (1.2)         | 254 (1.1)         | 247 (2.1)         | 3,381 (2.6)        | 1,089 (10.1)      | 19,392 (11.8)      |
| Retinopathy                                          | 1,862 (29.0)     | 6,291 (26.5)      | 2,816 (24.4)      | 30,317 (22.9)      | 3,936 (36.6)      | 54,684 (33.2)      |

|                                                                                                 | CPRD          |               | HIRD          |                | Medicare      |                |
|-------------------------------------------------------------------------------------------------|---------------|---------------|---------------|----------------|---------------|----------------|
|                                                                                                 | Dapagliflozin | Comparator    | Dapagliflozin | Comparator     | Dapagliflozin | Comparator     |
|                                                                                                 |               | GLD           |               | GLD            |               | GLD            |
| Peripheral neuropathy                                                                           | 230 (3.6)     | 718 (3.0)     | 216 (1.9)     | 2,496 (1.9)    | 749 (7.0)     | 10,866 (6.6)   |
| Peripheral vascular disease <sup>d</sup>                                                        | 272 (4.2)     | 974 (4.1)     | 2,724 (23.6)  | 30,004 (22.7)  | 4,194 (39.0)  | 60,905 (37.0)  |
| Coronary heart disease                                                                          | 1,053 (16.4)  | 3,819 (16.1)  | 1,412 (12.2)  | 16,542 (12.5)  | 4,394 (40.9)  | 65,775 (40.0)  |
| Cerebrovascular disease                                                                         | 316 (4.9)     | 1,312 (5.5)   | 215 (1.9)     | 2,773 (2.1)    | 1,622 (15.1)  | 25,146 (15.3)  |
| Amputation                                                                                      | 71 (1.1)      | 276 (1.2)     | 47 (0.4)      | 638 (0.5)      | 110 (1.0)     | 1,966 (1.2)    |
| Body mass index (kg/m <sup>2</sup> ), <sup>e</sup> n (%)                                        |               |               |               |                |               |                |
| < 20 (underweight)                                                                              | 8 (0.1)       | 39 (0.2)      | NA            | NA             | NA            | NA             |
| 20 to < 25 (normal)                                                                             | 255 (4.0)     | 1,446 (6.1)   | NA            | NA             | NA            | NA             |
| 25 to < 30 (overweight)                                                                         | 1,518 (23.7)  | 6,827 (28.7)  | NA            | NA             | NA            | NA             |
| 30 to < 40 (obese)                                                                              | 3,603 (56.2)  | 12,169 (51.2) | NA            | NA             | NA            | NA             |
| ≥ 40 (severely obese)                                                                           | 908 (14.2)    | 2,678 (11.3)  | NA            | NA             | NA            | NA             |
| Unknown                                                                                         | 119 (1.9)     | 609 (2.6)     | NA            | NA             | NA            | NA             |
| Healthcare utilization in the 180 days before the index date                                    |               |               |               |                |               |                |
| No. of outpatient visits, <sup>f</sup> n (%)                                                    |               |               |               |                |               |                |
| 0                                                                                               | 293 (4.6)     | 981 (4.1)     | 210 (1.8)     | 3,694 (2.8)    | 454 (4.2)     | 8,156 (5.0)    |
| 1                                                                                               | 620 (9.7)     | 2,231 (9.4)   | 531 (4.6)     | 6,931 (5.2)    | 607 (5.6)     | 10,205 (6.2)   |
| 2 or more                                                                                       | 5,498 (85.8)  | 20,556 (86.5) | 10,809 (93.6) | 121,571 (92.0) | 9,683 (90.1)  | 146,219 (88.8) |
| No. of hospitalizations, n (%)                                                                  |               |               |               |                |               |                |
| 0                                                                                               | 5,839 (91.1)  | 21,373 (89.9) | 11,150 (96.5) | 126,280 (95.5) | 10,035 (93.4) | 150,481 (91.4) |
| 1                                                                                               | 410 (6.4)     | 1,621 (6.8)   | 360 (3.1)     | 5,325 (4.0)    | 511 (4.8)     | 9,730 (5.9)    |
| 2 or more                                                                                       | 162 (2.5)     | 774 (3.3)     | 40 (0.3)      | 591 (0.4)      | 198 (1.8)     | 4,369 (2.7)    |
| No. of GLD classes <sup>g</sup> used within 12 months <sup>h</sup> before the index date, n (%) |               |               |               |                |               |                |
| 0                                                                                               | 63 (1.0)      | 438 (1.8)     | 1,542 (13.4)  | 21,550 (16.3)  | 678 (6.3)     | 13,440 (8.2)   |



|                                                | CPRD          |                | HIRD          |                | Medicare      |                 |
|------------------------------------------------|---------------|----------------|---------------|----------------|---------------|-----------------|
|                                                | Dapagliflozin | Comparator     | Dapagliflozin | Comparator     | Dapagliflozin | Comparator      |
|                                                |               | GLD            |               | GLD            |               | GLD             |
| 1-2                                            | 4,253 (66.3)* | 20,316 (85.5)* | 8,228 (71.2)  | 100,001 (75.6) | 6,766 (63.0)* | 120,763 (73.4)* |
| 3-4                                            | 2,070 (32.3)* | 2,983 (12.6)*  | 1,777 (15.4)* | 10,636 (8.0)*  | 3,267 (30.4)* | 30,124 (18.3)*  |
| 5-8                                            | 25 (0.4)      | 31 (0.1)       | NR            | NR             | 33 (0.3)      | 253 (0.2)       |
| Type of index therapy, <sup>i</sup> n (%)      |               |                |               |                |               |                 |
| Index monotherapy with no prior treatment      | 117 (1.8)     | 409 (1.7)      | 808 (7.0)     | 7,652 (5.8)    | 1,039 (9.7)   | 12,009 (7.3)    |
| Combined index therapy with no prior treatment | 97 (1.5)      | 679 (2.9)      | 900 (7.8)     | 15,115 (11.4)  | 532 (5.0)     | 15,997 (9.7)    |
| Add-on index therapy                           | 4,039 (63.0)  | 17,033 (71.7)  | 7,927 (68.6)  | 86,106 (65.1)  | 6,171 (57.4)  | 87,377 (53.1)   |
| Switched-to index therapy                      | 198 (3.1)     | 1,325 (5.6)    | 208 (1.8)     | 1,963 (1.5)    | 758 (7.1)     | 15,319 (9.3)    |
| Add-on and switched-to index therapy           | 1,729 (27.0)* | 3,489 (14.7)*  | 865 (7.5)     | 6,966 (5.3)    | 1,671 (15.6)  | 24,800 (15.1)   |
| Nonevaluable <sup>j</sup>                      | 231 (3.6)     | 833 (3.5)      | 842 (7.3)     | 14,394 (10.9)  | 573 (5.3)     | 9,078 (5.5)     |

CPRD = Clinical Practice Research Datalink; GLD = glucose-lowering drug; HIRD = HealthCore Integrated Research Database; NA = not applicable; SD = standard deviation.

\* Absolute standardized difference (StDiff) > 0.20.

<sup>a</sup> Patients were aged 18 years or older in CPRD, 18-64 years in the HIRD, and 65 years or older in Medicare.

<sup>b</sup> Data on race/ethnicity were available only in Medicare.

<sup>c</sup> Includes patients categorized as Other or North American Native in Medicare.

<sup>d</sup> Includes peripheral artery disease.

<sup>e</sup> Data on body mass index were available only in CPRD.

<sup>f</sup> Outpatient visits included general practitioner and outpatient hospital visits.

<sup>g</sup> Glucose-lowering drug classes that were considered were insulin, sulfonylureas, thiazolidinediones, dipeptidyl peptidase-4 (DPP-4) inhibitors, glucagon-like peptide-1 (GLP-1) receptor agonists, biguanides (metformin), alpha glucosidase inhibitors, and meglitinides.

<sup>h</sup> Those with at least 180 days of available lookback data before the index date were eligible for inclusion in the study, and therefore some patients had less than 12 months of available lookback data.

<sup>i</sup> Detailed definitions for the index therapy type categories are provided in Section 1.5.

<sup>j</sup> Patients who did not have sufficient follow-up time to assess the 90-day add-on/switch requirement.

**Figure S1. Balance of Covariates<sup>a</sup> in the Cohorts to Assess Hospitalization for Acute Liver Injury, Full Cohort Before Propensity Score Trimming and Within Propensity Score Strata After Trimming, by Data Source**

**CPRD**

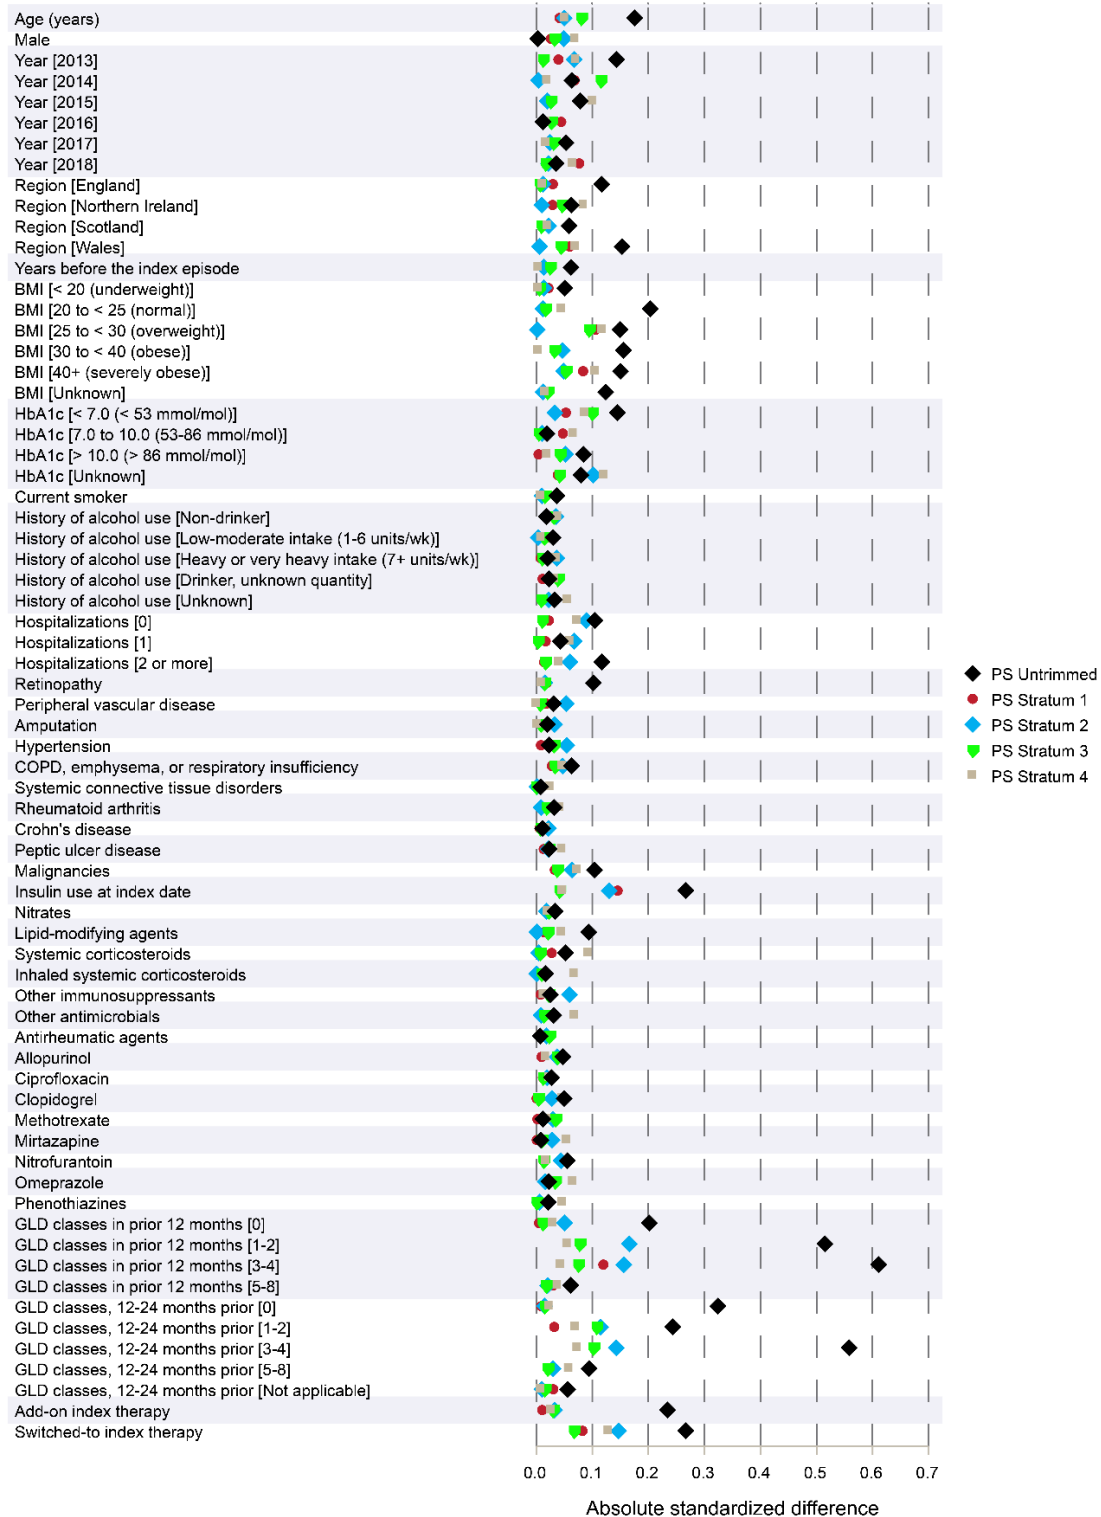

# HIRD

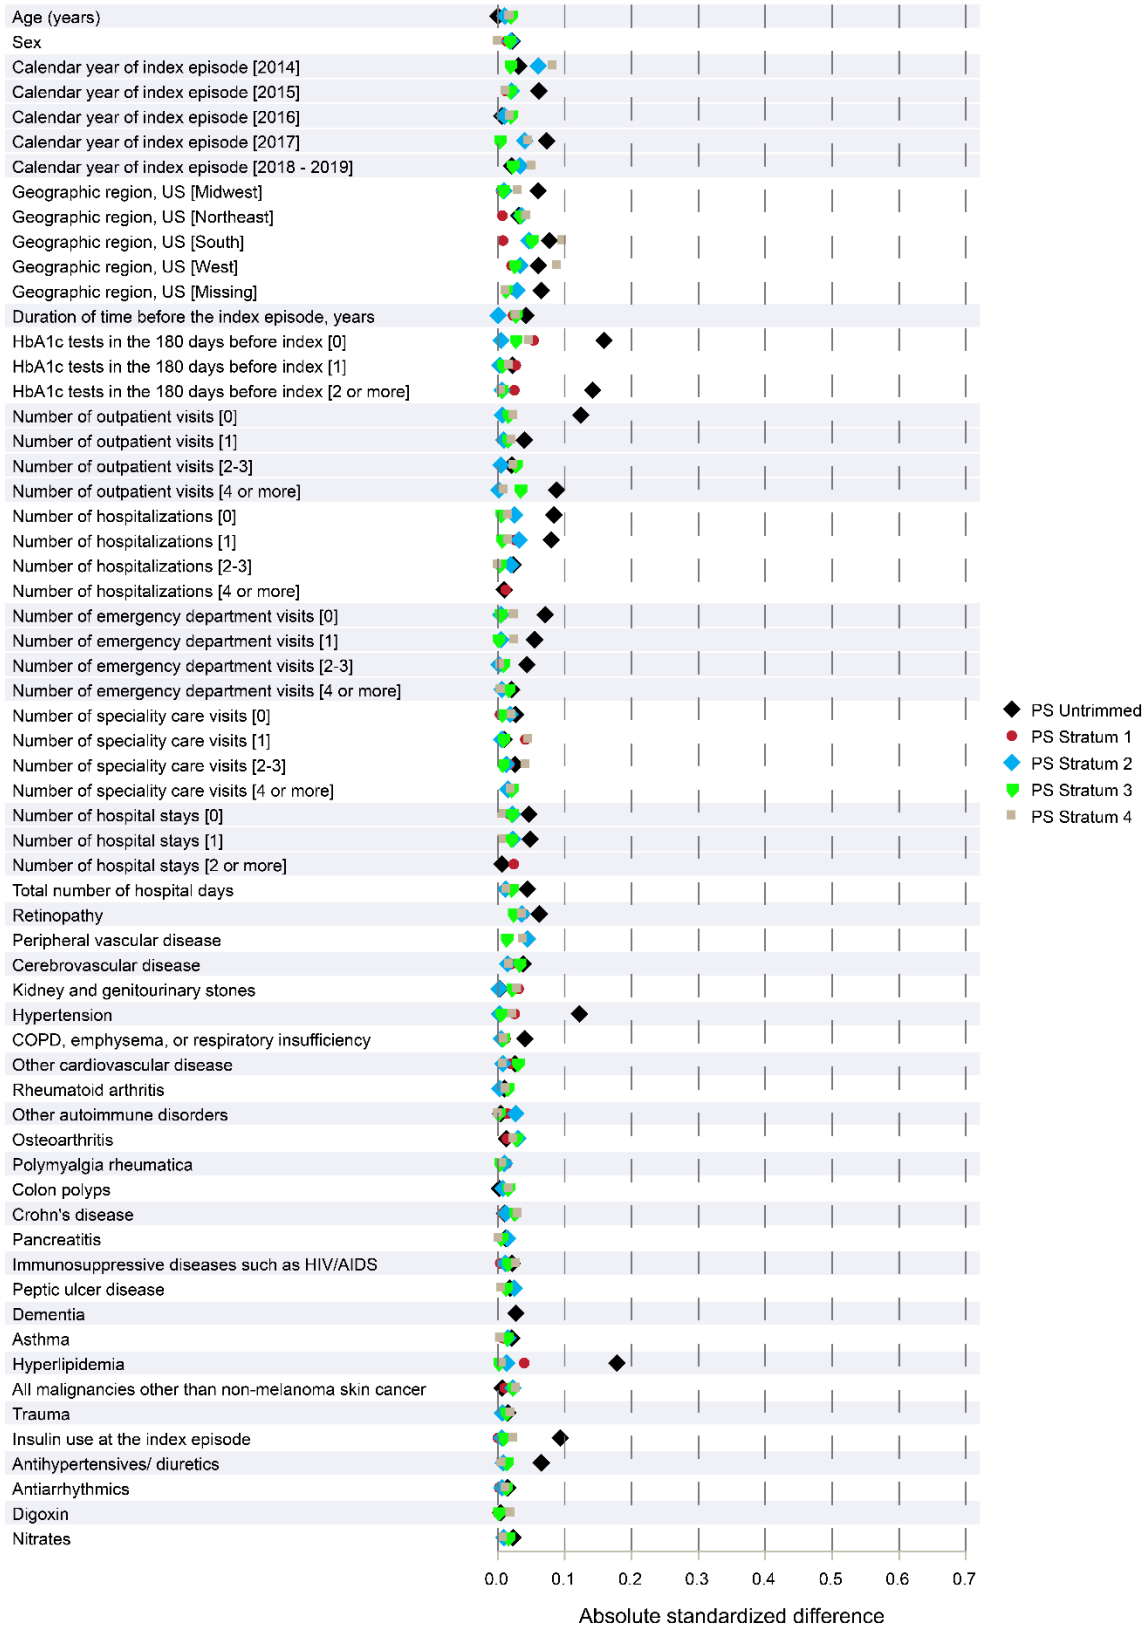

Continued on next page.

Continued from previous page.

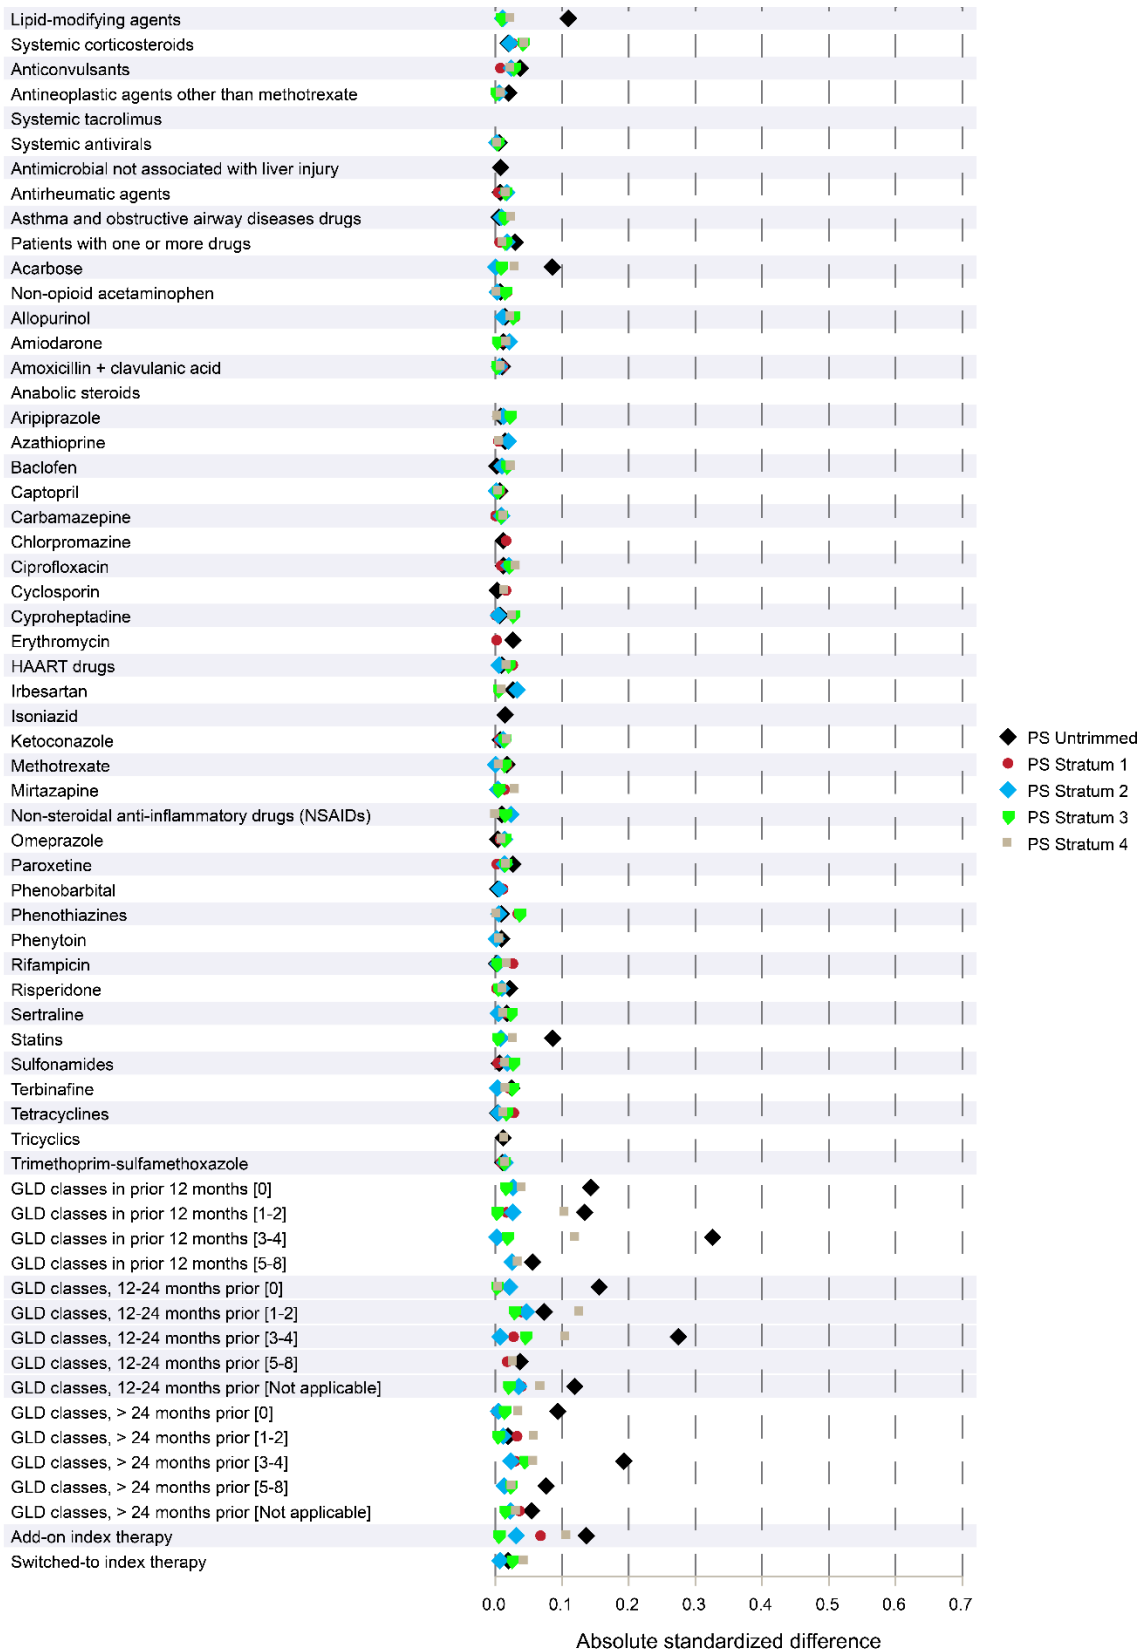

# Medicare

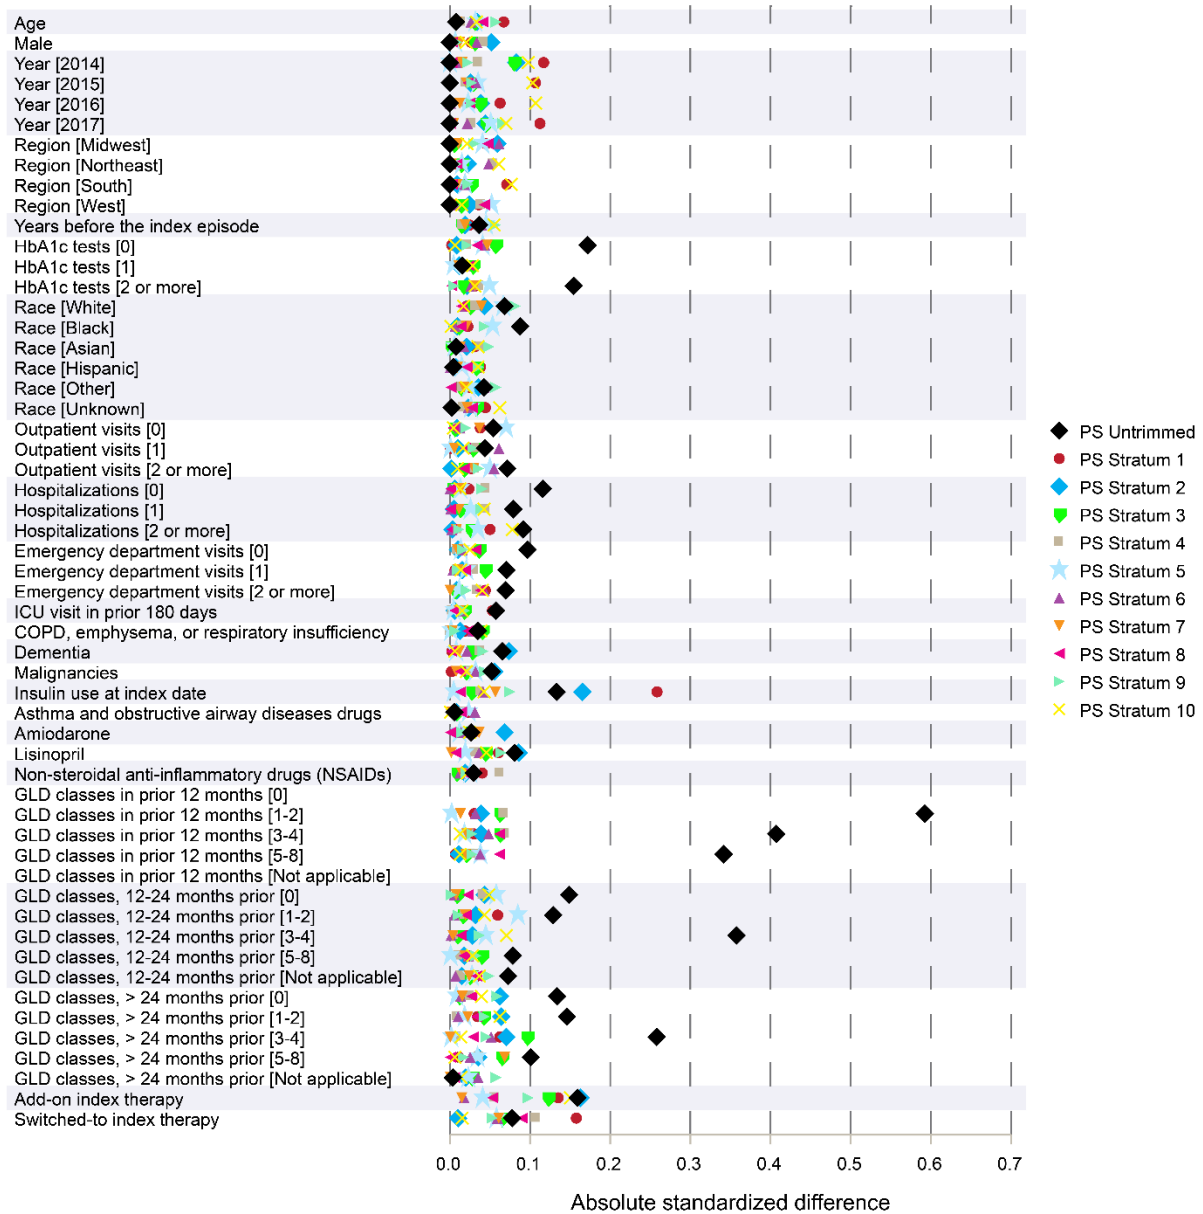

BMI = body mass index; COPD = chronic obstructive pulmonary disease; CPRD = Clinical Practice Research Datalink; GLD = glucose-lowering drug; HAART = highly active antiretroviral therapy; HbA1c = glycated hemoglobin; HIRD = HealthCore Integrated Research Database HIV = human immunodeficiency virus; ICU = intensive care unit; PS = propensity score; US = United States.

<sup>a</sup> Each data source-specific plot presents only the variables that were included as covariates in the propensity score model for each respective data source.

**Figure S2. Adjusted Incidence Rate Ratios for Hospitalization for Acute Liver Injury, Sensitivity Analyses Compared With the Primary Results**

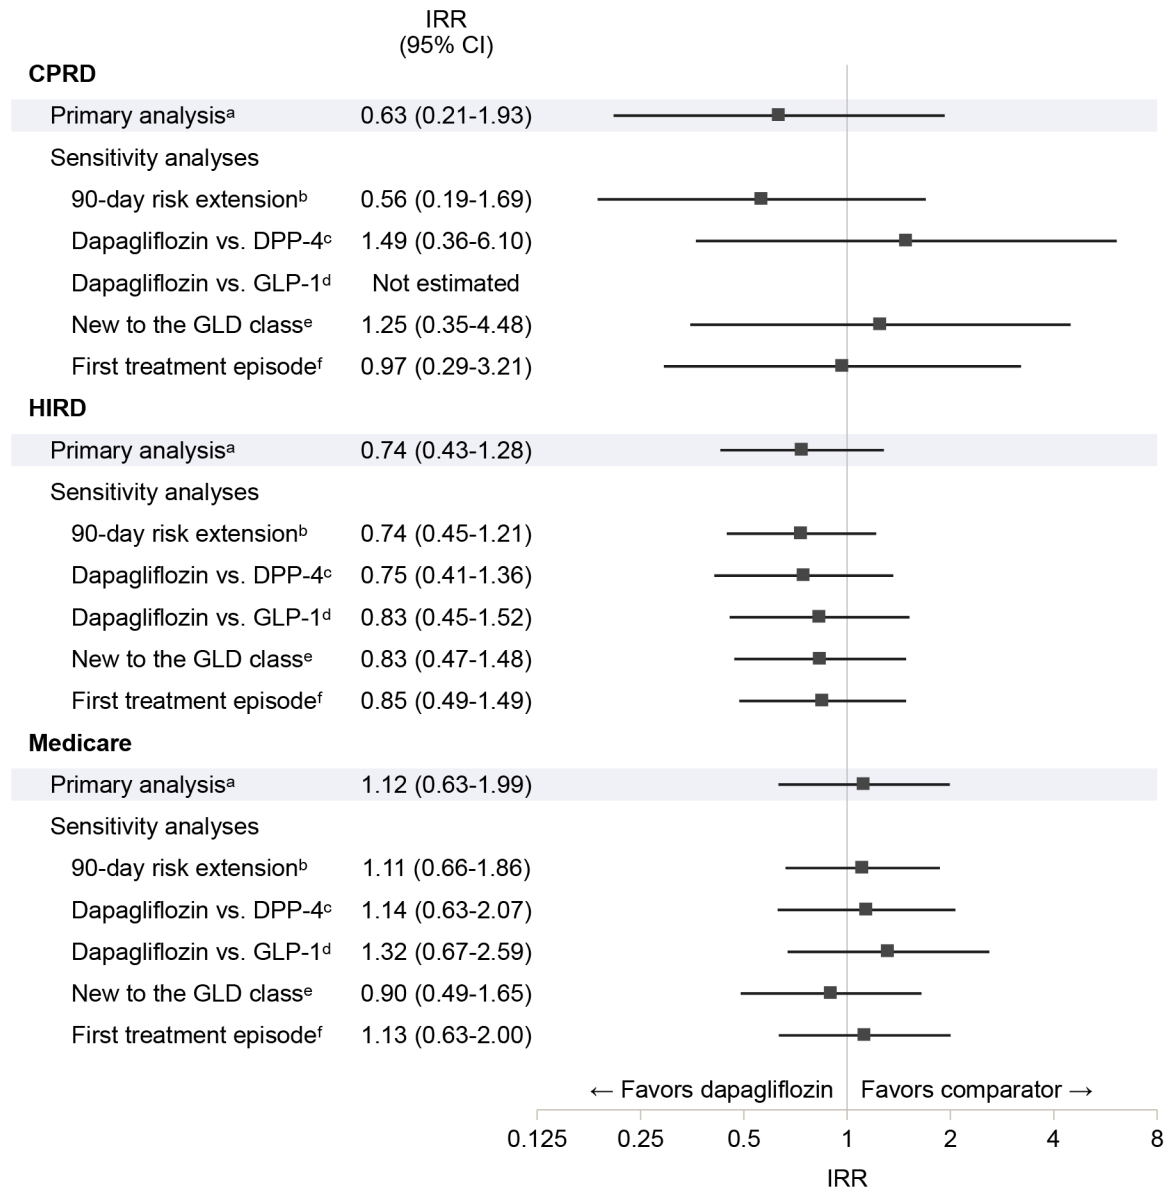

CI = confidence interval; CPRD = Clinical Practice Research Datalink; GLD = glucose-lowering drug; DPP-4 = dipeptidyl peptidase-4; GLP-1 = glucagon-like peptide-1; HIRD = HealthCore Integrated Research Database; IRR = incidence rate ratio.

<sup>a</sup> The primary analysis was the overall analysis.

<sup>b</sup> The risk extension window was increased from 30 days to 90 days.

<sup>c</sup> Compared dapagliflozin treatment episodes with treatment episodes of DPP-4 inhibitors as an alternative comparator GLD cohort. Propensity scores were calculated on the overall sample.

<sup>d</sup> Compared dapagliflozin treatment episodes with treatment episodes of GLP-1 receptor agonists as an alternative comparator GLD cohort. Propensity scores were calculated on the overall sample.

<sup>e</sup> Included only comparator GLD treatment episodes in which the patient was new to the index GLD class. The propensity score model was calculated after removing patients not new to the index GLD class.

<sup>f</sup> Conducted using only the first treatment episode for each person in each treatment group in the primary analysis sample.

**Figure S3. Balance of Covariates<sup>a</sup> in the Cohorts to Assess Severe Complications of Urinary Tract Infection, Full Cohort Before Propensity Score Trimming and Within Propensity Score Strata After Trimming, by Sex and Data Source**

**Females – CPRD**

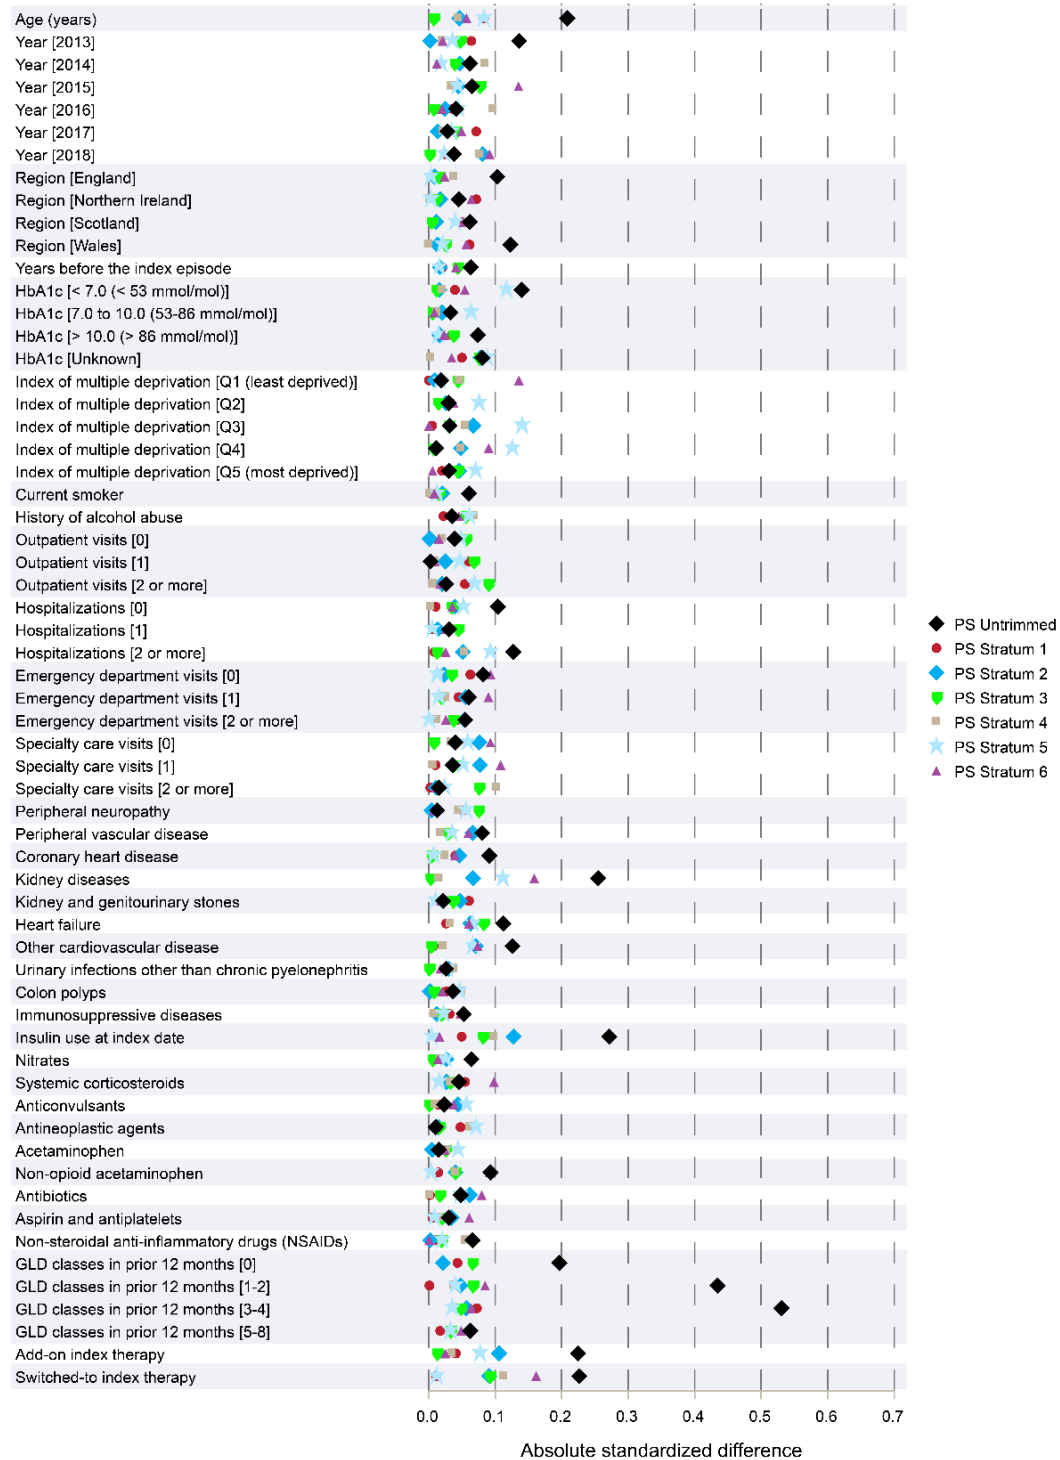

## Females – HIRD

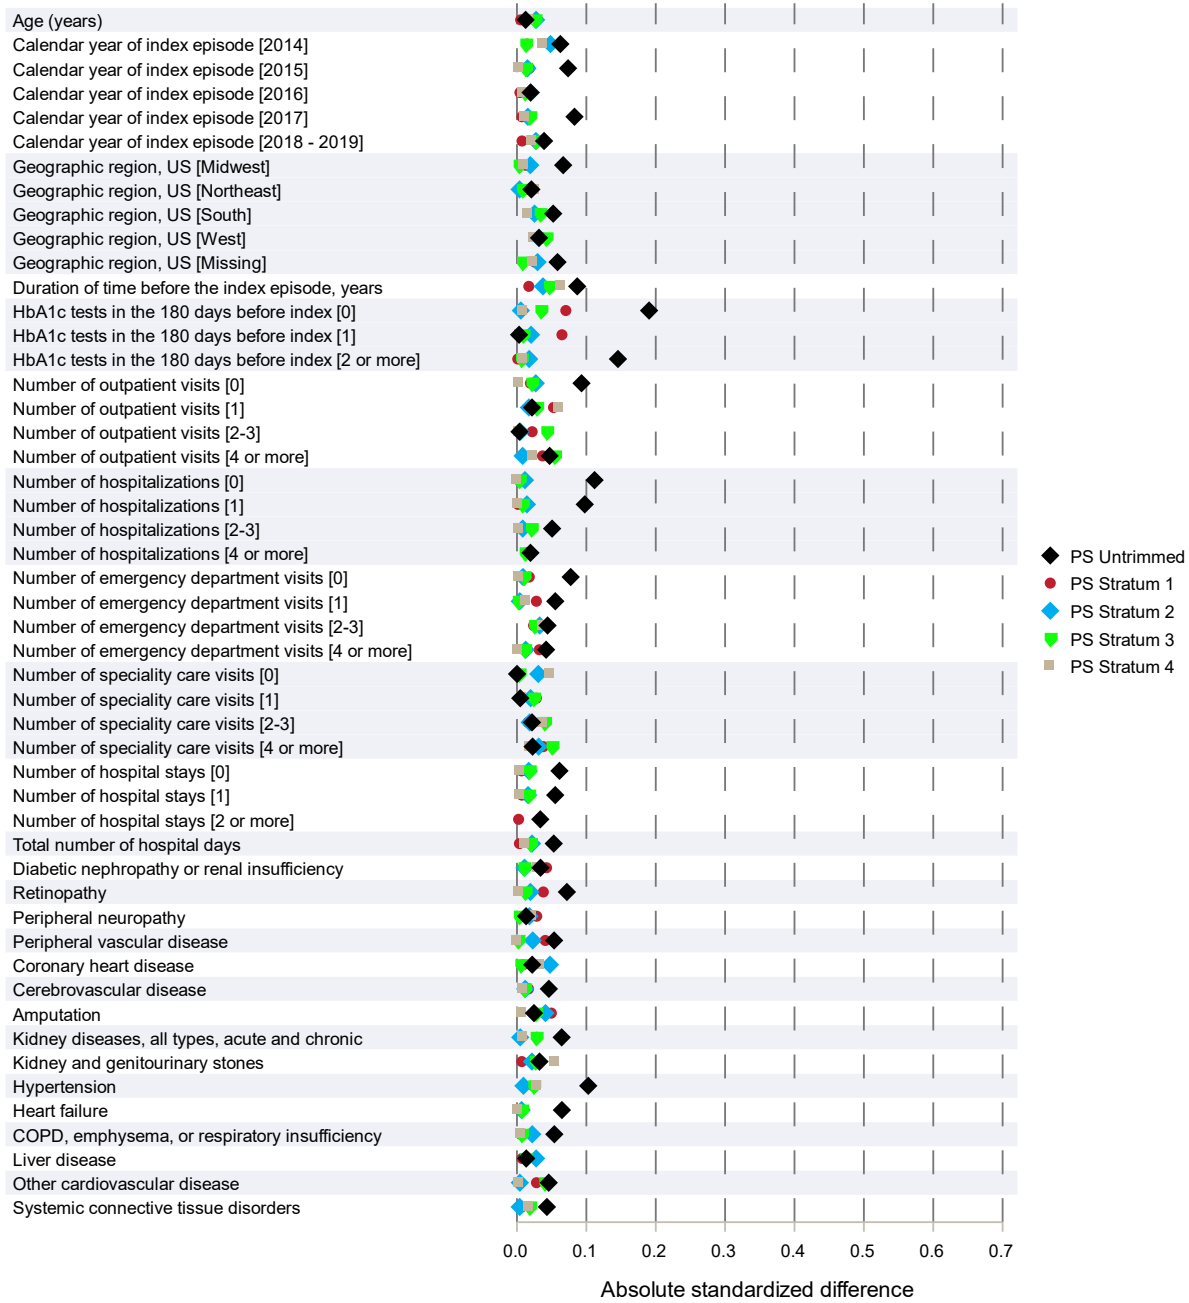

Continued on next page.



Continued from previous page.

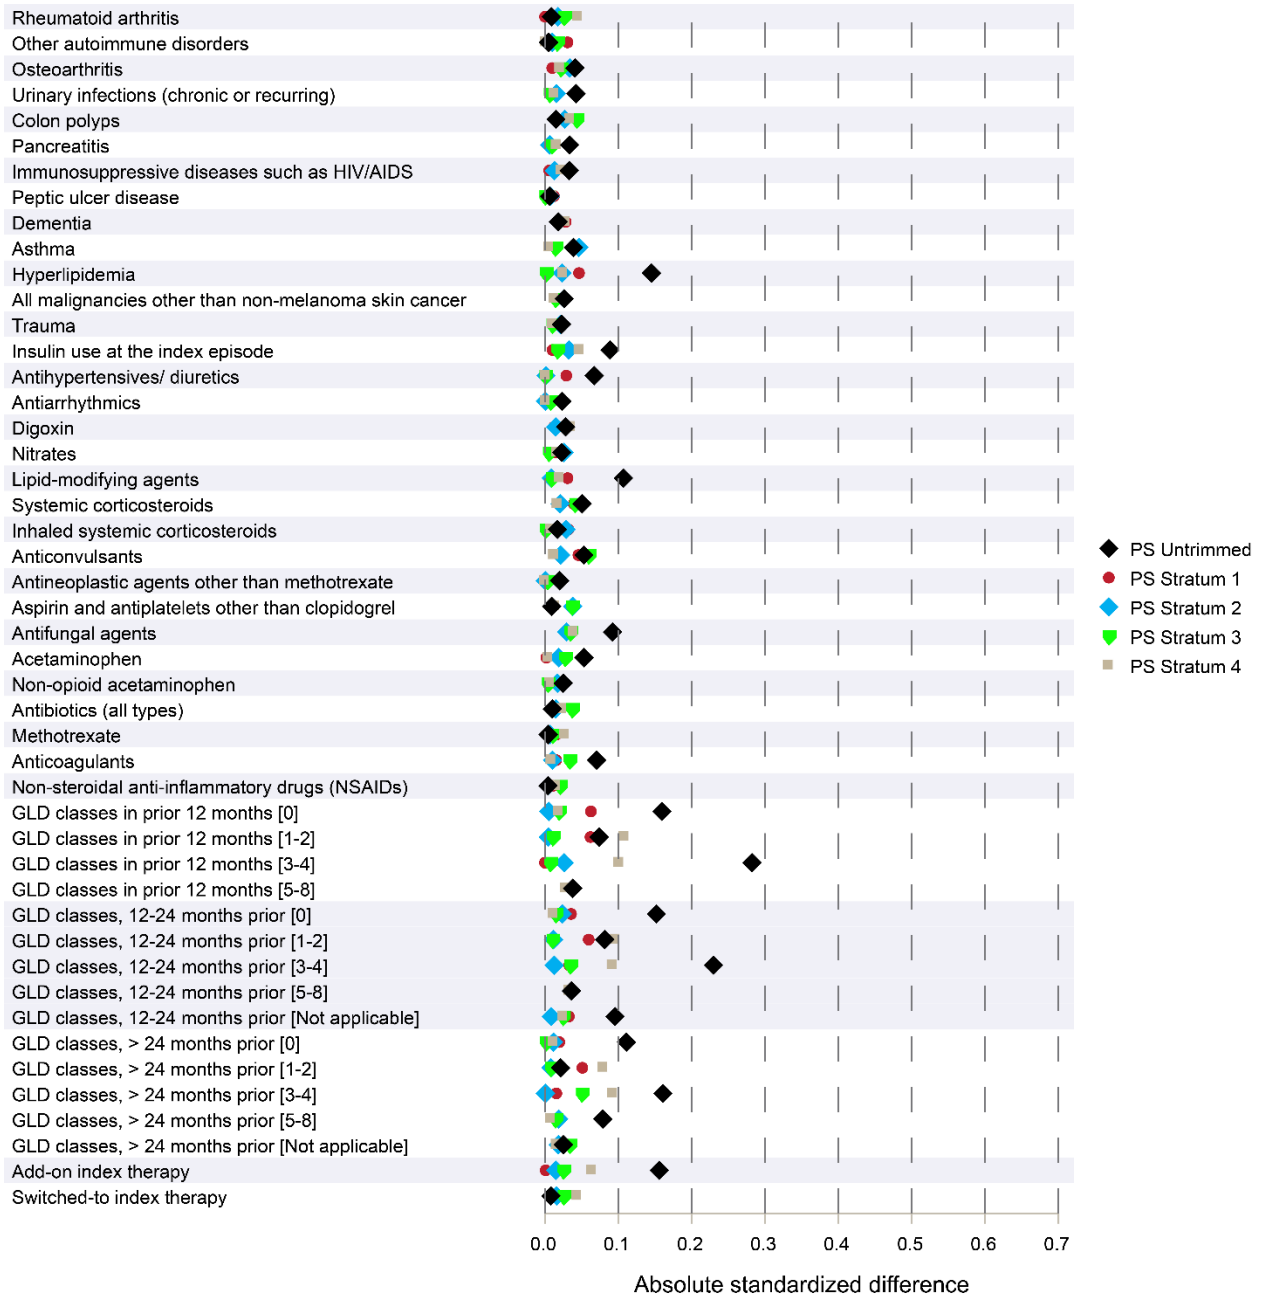

## Females – Medicare

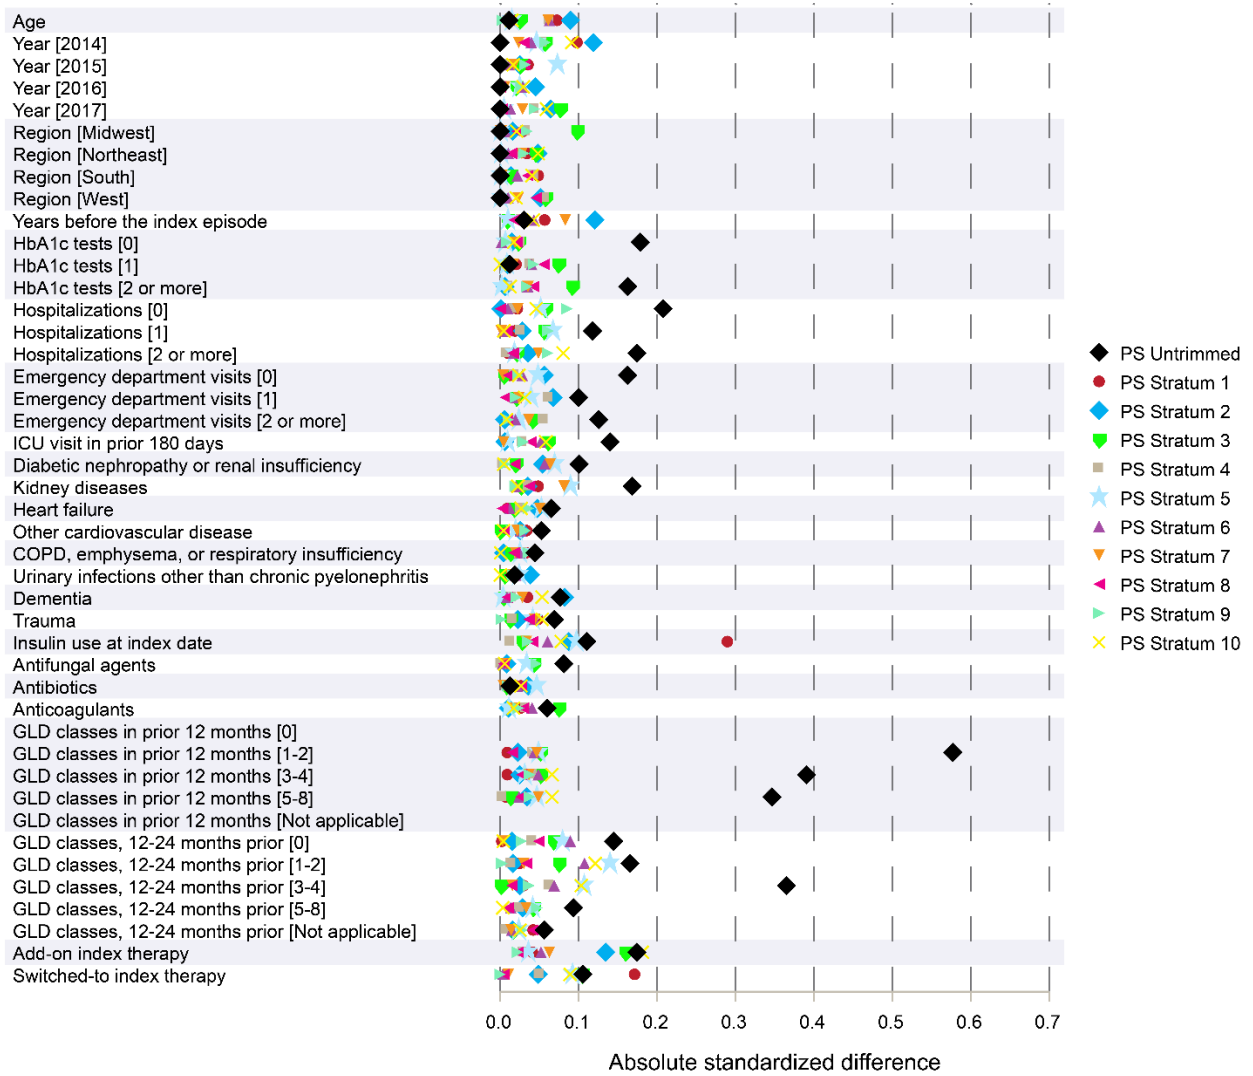

# Males – CPRD

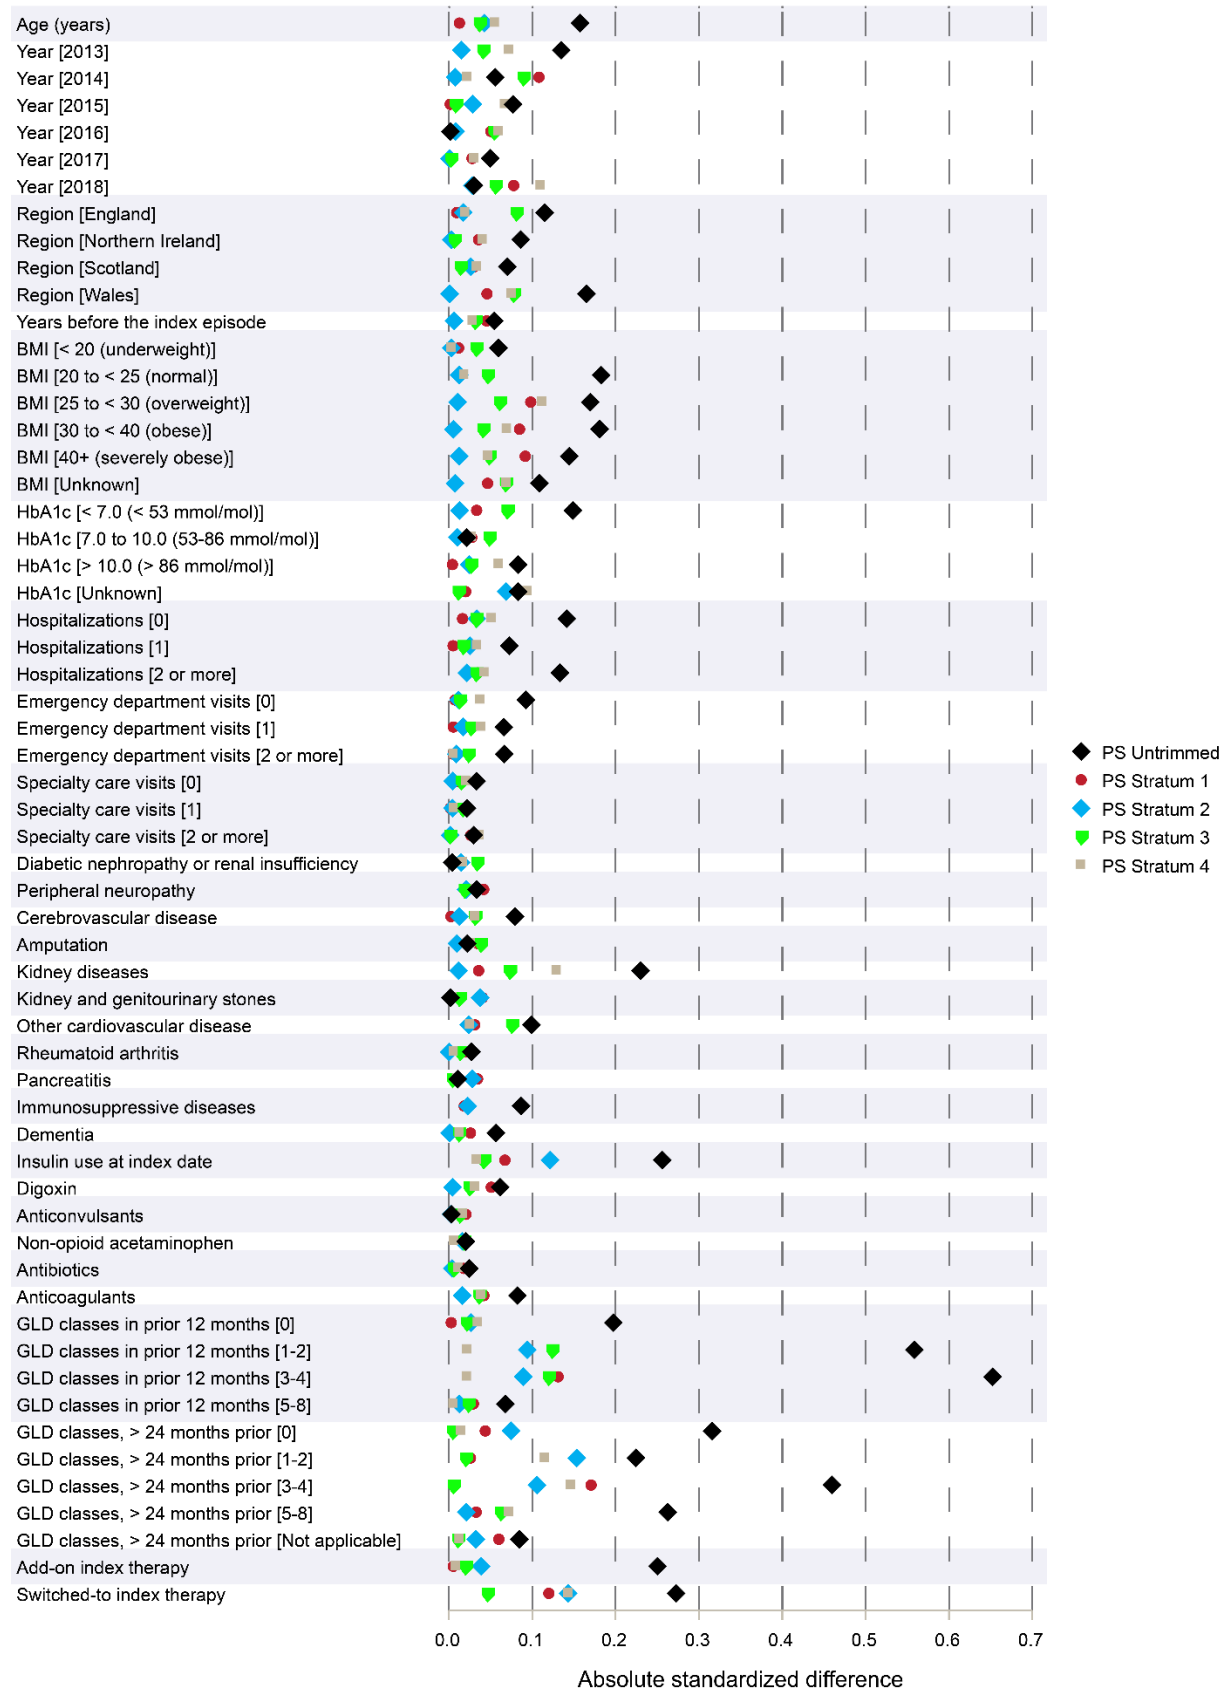

## Males – HIRD

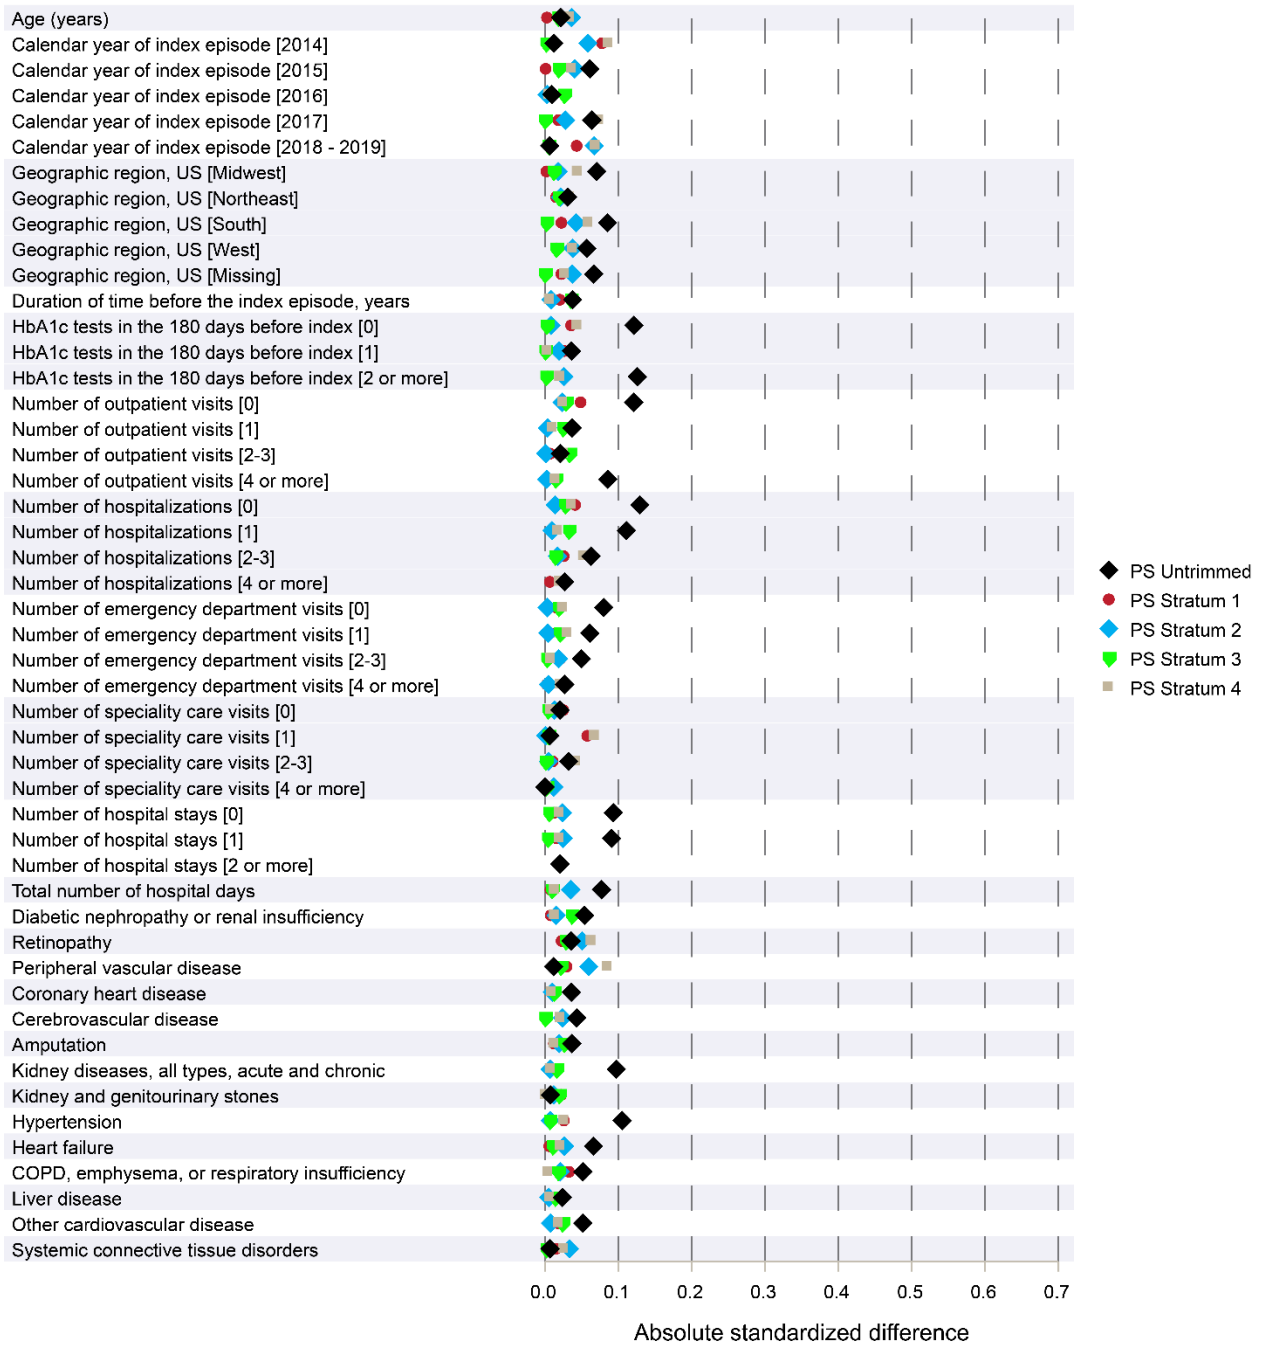

Continued on next page.

Continued from previous page.



## Males – Medicare

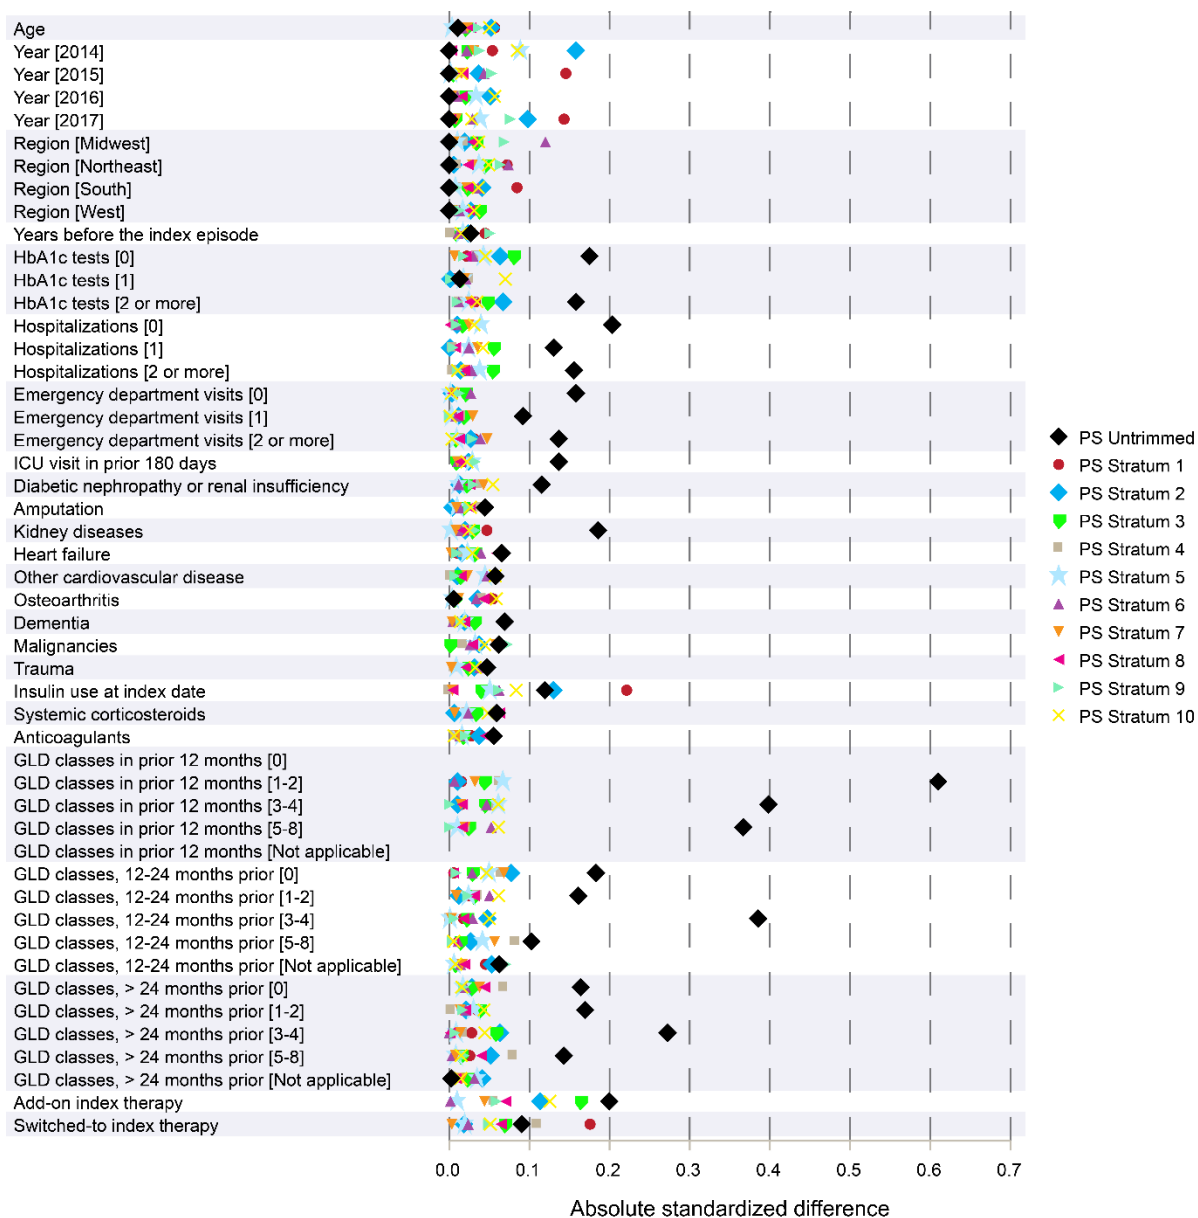

BMI = body mass index; COPD = chronic obstructive pulmonary disease; CPRD = Clinical Practice Research Datalink; GLD = glucose-lowering drug; HbA1c = glycated hemoglobin; HIRD = HealthCore Integrated Research Database; HIV = human immunodeficiency virus; ICU = intensive care unit;  $Q_n$  = quintile; PS = propensity score; US = United States.

<sup>a</sup> Each data source-specific plot presents only the variables that were included as covariates in the propensity score model for each respective data source.

**Figure S4. Adjusted Incidence Rate Ratios for Severe Complications of Urinary Tract Infection, Sensitivity Analyses Compared With the Primary Results, by Sex**

**Females**

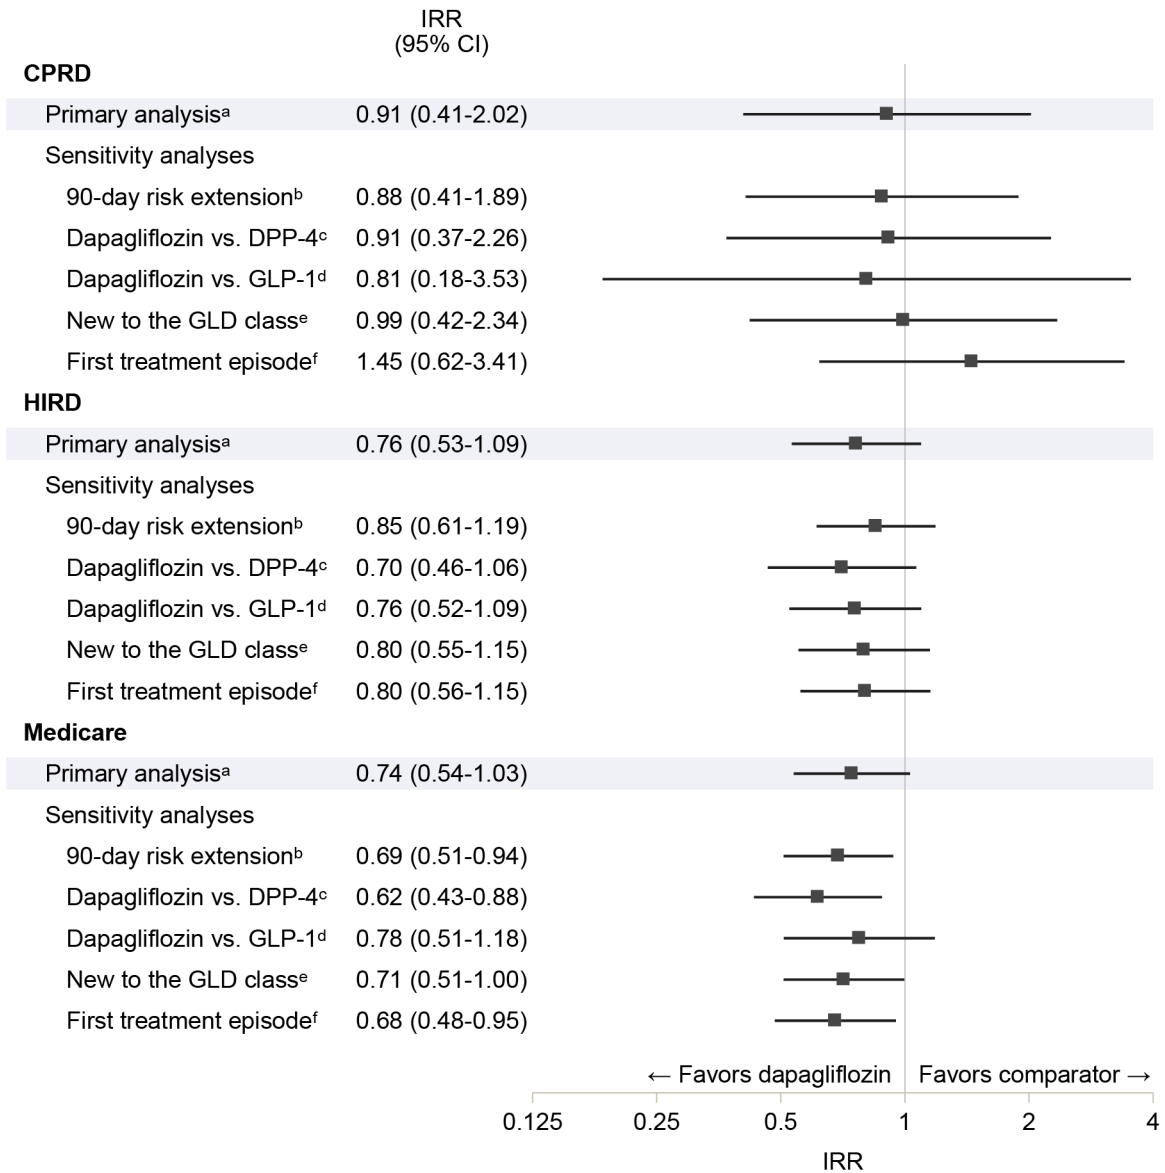

## Males

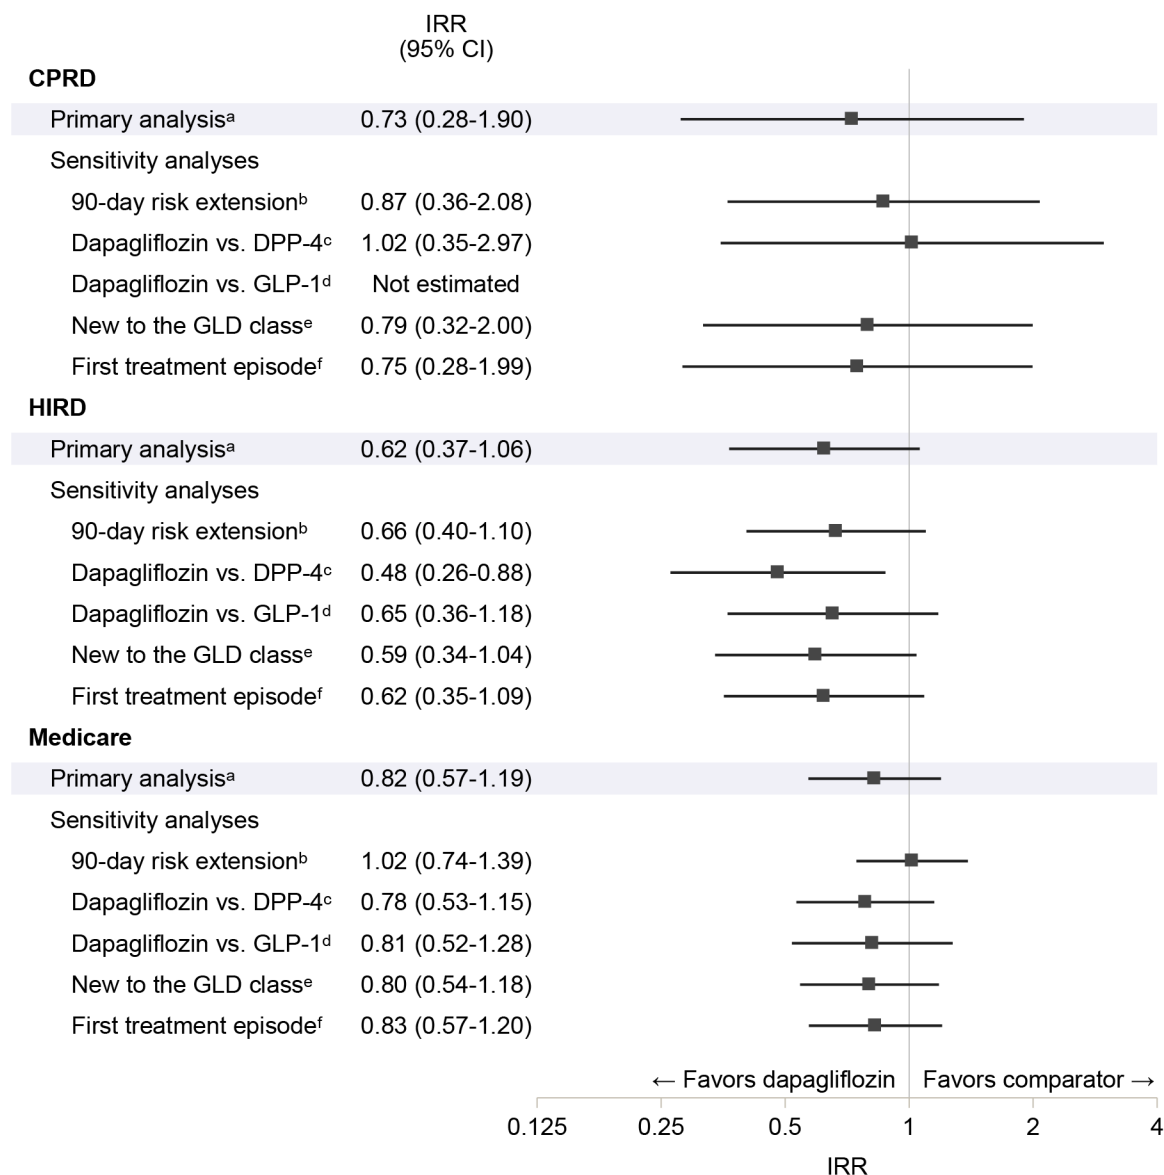

CI = confidence interval; CPRD = Clinical Practice Research Datalink; GLD = glucose-lowering drug; DPP-4 = dipeptidyl peptidase-4; GLD = glucose-lowering drug; GLP-1 = glucagon-like peptide-1; HIRD = HealthCore Integrated Research Database; IRR = incidence rate ratio.

<sup>a</sup> The primary analysis was the overall analysis.

<sup>b</sup> The risk extension window was increased from 30 days to 90 days.

<sup>c</sup> Compared dapagliflozin treatment episodes with treatment episodes of DPP-4 inhibitors as an alternative comparator GLD cohort. Propensity scores were calculated on the overall sample.

<sup>d</sup> Compared dapagliflozin treatment episodes with treatment episodes of GLP-1 receptor agonists as an alternative comparator GLD cohort. Propensity scores were calculated on the overall sample.

<sup>e</sup> Included only comparator GLD treatment episodes in which the patient was new to the index GLD class. The propensity score model was calculated after removing patients not new to the index GLD class.

<sup>f</sup> Conducted using only the first treatment episode for each person in each treatment group in the primary analysis sample.



## **PART B. SUPPLEMENTAL METHODS AND RESULTS**

### **1 Methods and Results**

#### **1.1 Treatment Episodes**

The *index date* for a treatment episode was defined as the date a patient received a new prescription or dispensing of either dapagliflozin (single-entity dapagliflozin or the fixed-dose combination of dapagliflozin and another GLD) or an eligible comparator GLD on or after the beginning of the study period if all inclusion criteria have been met. To identify the index treatment episodes, the first use of dapagliflozin or each potential comparator GLD was identified in the patient's entire available history, and treatment episodes occurring within the study period were eligible for selection into the study analysis.

##### **1.1.1 Primary Exposure**

The primary exposure of interest was newly initiated dapagliflozin use during the study period by eligible patients with or without concomitant use of any other GLD. Dapagliflozin could be prescribed or dispensed either as a single agent, as part of a fixed-dose combination with metformin or other GLDs, or as part of free-form combinations with other blood glucose-lowering drugs, including insulin.

All eligible dapagliflozin new-use treatment episodes were evaluated first and included in the analysis if at least one eligible new-use comparator GLD episode could be matched to the dapagliflozin treatment episode. If dapagliflozin and an eligible comparator GLD were initiated by an individual patient on the same day, the dapagliflozin treatment episode was selected as the index treatment episode in the study analysis.

##### **1.1.2 Comparator Exposure**

Comparator GLD exposure was defined as new use of any eligible GLD with or without concomitant use of any other GLD on the index date. Comparator GLD exposure did not include insulin monotherapy, metformin monotherapy, or sulfonylurea monotherapy, but the combination of metformin plus sulfonylurea was considered as an eligible comparator GLD. Initial new-use dates for comparator GLD exposure was selected based on individual drug substances, not by drug class.

If metformin or a sulfonylurea medication (not as a preparation combined with another GLD) was initiated during a comparator GLD treatment episode (before the 30-day extension period) it was considered as part of the treatment episode. Metformin or sulfonylurea monotherapy, if added as monotherapy during the 30-day risk extension window, did not extend a continuous comparator GLD treatment episode.

Multiple treatment episodes for a patient could be selected as comparator GLD exposures during the matching process if a qualifying drug substance was initiated at a point in time after the first eligible treatment episode ended and was a different drug substance than the first. Potential comparator GLDs were eligible to enter the pool of treatment episodes from which comparator episodes could be selected multiple times (i.e., if they qualified with drug substance A and then later switched to drug substance B, which also qualified as a new comparator drug, they could enter both times). In Figure S5, all three comparator GLD treatment episodes are eligible to be matched to a dapagliflozin treatment episode and enter in the analysis. However, given that overlapping person-time of treatment episodes is not allowed, if the comparator GLD B treatment episode is selected into analysis by being matched to a dapagliflozin episode (Panel A), then the treatment episodes for both comparator GLD A and comparator GLD C would then not be eligible to also be selected because they overlap with the comparator GLD B treatment episode. Likewise, the treatment episodes for both comparator GLD A and comparator GLD C could be selected into the analysis (Panel B), but the treatment episode for comparator GLD B would not be eligible to also be selected because it overlaps with both.

**Figure S5. Eligible Comparator GLD Treatment Episodes Available for Selection into the Study Analysis**

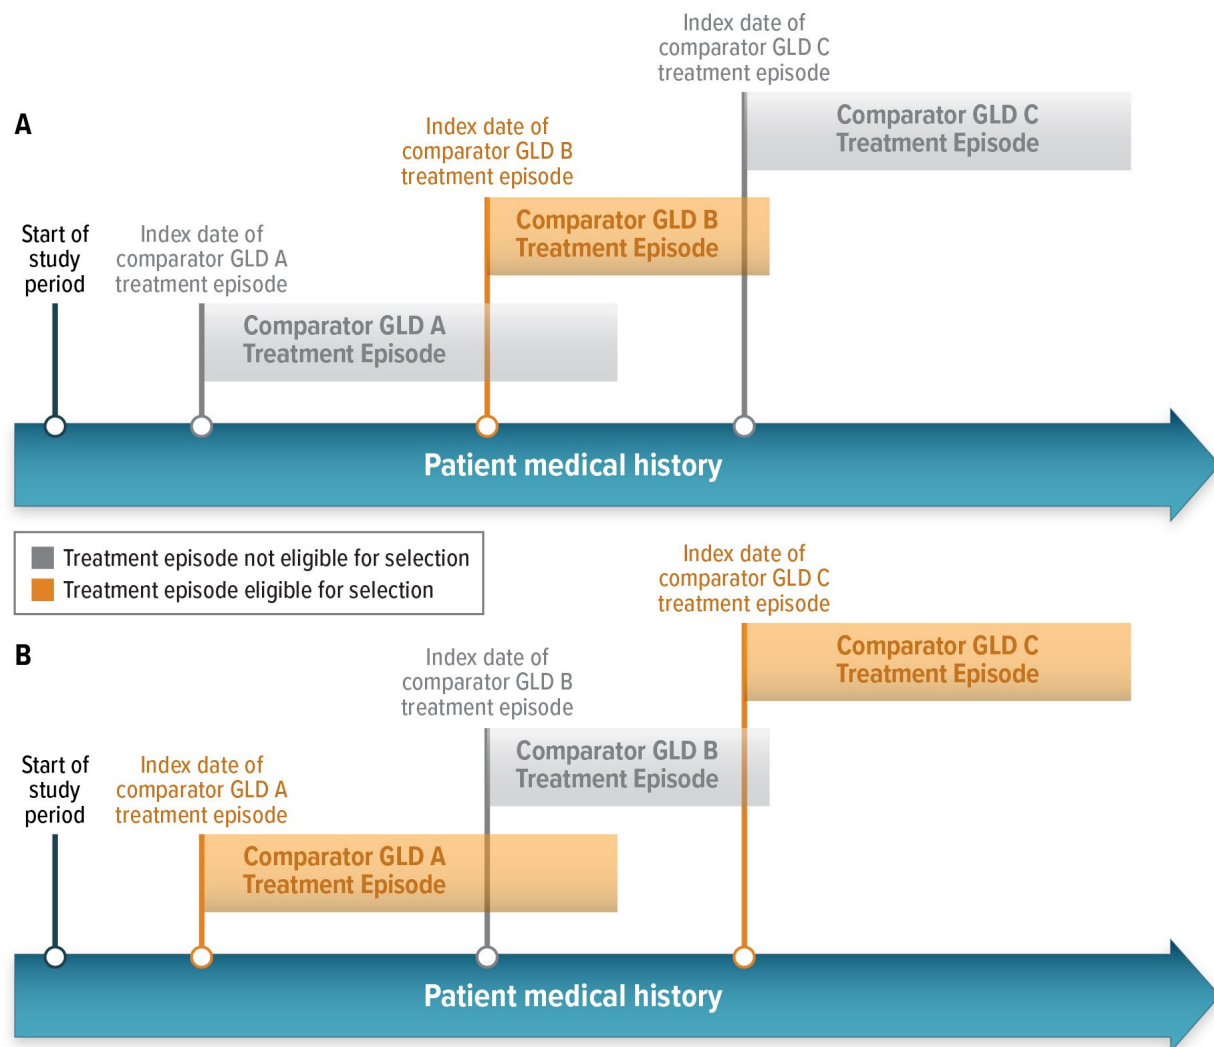

GLD = glucose-lowering drug.

Note: The orange treatment episodes represent comparator GLD treatment episodes that are selected (i.e., matched to a dapagliflozin treatment episode) or eligible for selection based on other comparator GLD treatment episodes that are selected. The gray comparator GLD treatment episodes represent treatment episodes that are not eligible to be selected due to overlap with other selected comparator GLD treatment episodes.

Figure S6 illustrates a scenario where a patient contributes person-time to both the comparator GLD group and the dapagliflozin group. Patients selected as new users of dapagliflozin and who later switched to an eligible comparator GLD, after the dapagliflozin exposure period terminated, were also eligible to be selected as a comparator GLD. Separate non-overlapping treatment episodes for the same patient were assumed to be independent. Therefore, a given patient could have more than one index date for different eligible medications. Follow-up was not censored with the addition of another GLD during the treatment episode, unless dapagliflozin or another SGLT2 inhibitor was initiated during a comparator GLD treatment episode. This is illustrated in

Figure S6, where the comparator GLD A treatment episode is censored at the index date of the dapagliflozin treatment episode.

**Figure S6. Example of Patient Contributing Person-time to the Comparator GLD Group and the Dapagliflozin Group**

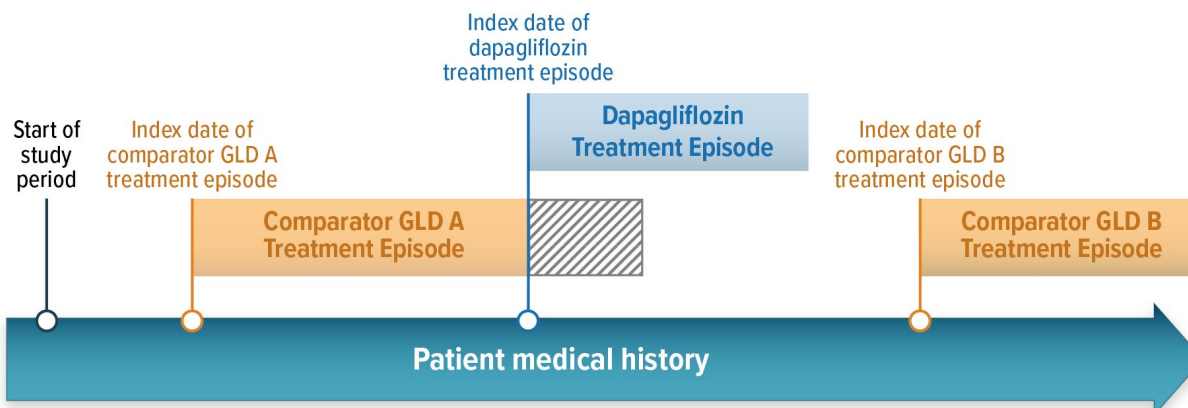

GLD = glucose-lowering drug.

Note: The hatched gray represents comparator GLD A person-time that is not counted in the analysis due to censoring at the initiation of dapagliflozin.

## 1.2 Propensity Score Modeling Approach

Propensity score models were built separately in each data source for each of the outcomes, hospitalization for acute liver injury (hALI) and severe complications of urinary tract infection (sUTI), to estimate the probability of an individual receiving dapagliflozin versus a comparator glucose-lowering drug (GLD). For the sUTI outcome, separate propensity score models were built for females and males. Covariates were selected for the propensity score models from a list of preidentified potential confounders. First, we evaluated each individual covariate's influence on the association of dapagliflozin exposure with hALI or sUTI using separate Cox proportional hazards regression models with a base set of covariates that was the same in all data sources: age at the index date, sex, duration of lookback time, primary care practice or geographic region, whether the index medication was “added on” or “switched to” (yes/no; detailed definitions for the index therapy type are described in Section 1.5), insulin use at the index date (yes/no), and calendar year of the index date. Second, each of the remaining potential candidate variables were included in separate base models, and if the resulting treatment-related hazard ratio (HR) met one of two conditions—(1) change in the absolute value of the HR estimate of more than 0.005 or (2) change in the value of the HR estimate of more than 0.05%—the variable was selected for inclusion in the final propensity score model. Lastly, we calculated propensity scores for each treatment episode by fitting a multivariate logistic regression model with exposure as the dependent variable (0 = comparator GLD initiator, 1 = dapagliflozin initiator) and including as independent variables the base set of covariates and all other data source-specific covariates identified in the variable selection process. The standardized differences plots presented in

Figure S1 (hALI) and Figure S3 (sUTI) show the variables included in each data source–specific propensity score model.

### **1.3 Estimation of Pooled Adjusted Incidence Rate Ratio**

For each study outcome in each data source, the adjusted data source–specific incidence rate ratio (IRR) estimates were pooled across the data sources to generate an overall (i.e., pooled) adjusted IRR estimate. Before pooling, we evaluated homogeneity among the data source–specific IRRs by examining the value and direction of the IRRs and their corresponding 95% confidence intervals (CIs).

Within each data source, separately for each outcome, event counts and person-time were aggregated by exposure category and propensity score stratum. The stratum-specific estimates were pooled across all data sources using Mantel-Haenszel methods [1].

Statistical heterogeneity between the data source–specific estimates was assessed using the  $I^2$  index [2]. This index measures the amount of between-study variation in the IRRs and thus the appropriateness of pooling estimates from the data sources. If the calculated  $I^2$  index was below 50%, the pooled Mantel-Haenszel–adjusted IRR was reported.

### **1.4 Assessment of the Potential Effect of Unmeasured Confounders (Quantitative Bias Analysis Methods, Results, and Interpretation)**

In this sensitivity analysis, the potential impact of a hypothetical unmeasured confounder on the observed pooled IRRs for each of the study outcomes, hALI and sUTI, was evaluated using quantitative bias analysis. We used the method described by Lash et al. [3].

A series of IRRs associating dapagliflozin exposure with the outcome, adjusted for a hypothetical unmeasured confounder, were plotted under varying assumptions of unmeasured confounding compared with the observed IRR estimate from the pooled analysis. Figure S7 (hALI) and Figure S8 (sUTI) each present three scenarios of the association of a hypothetical unmeasured confounder with the study outcome—relative risk (RR) = 1.5 (moderate association, blue), RR = 3.0 (strong association, red), and RR = 4.5 (very strong association, green)—with a series of potential imbalances of the prevalence of the hypothetical unmeasured confounder in the two treatment groups. The series of prevalence imbalances range from -100% (i.e., the hypothetical unmeasured confounder is present in every comparator GLD patient and not present in any dapagliflozin patient) to 100% (i.e., the hypothetical unmeasured confounder is present in every dapagliflozin patient and not present in any comparator GLD patient). The colored bands for each confounding scenario represent the minimum and maximum possible corrected IRR (i.e., corrected for hypothetical unmeasured confounder strength) at each level of prevalence imbalance, and the solid line represents the mean corrected IRR at each imbalance level.

### 1.4.1 Hospitalization for Acute Liver Injury

**Figure S7. Sensitivity Analysis, Adjusted Incidence Rate Ratios for hALI Under Varying Assumptions of Unmeasured Confounding Compared With the Observed Incidence Rate Ratio Estimate From the Pooled Analysis**

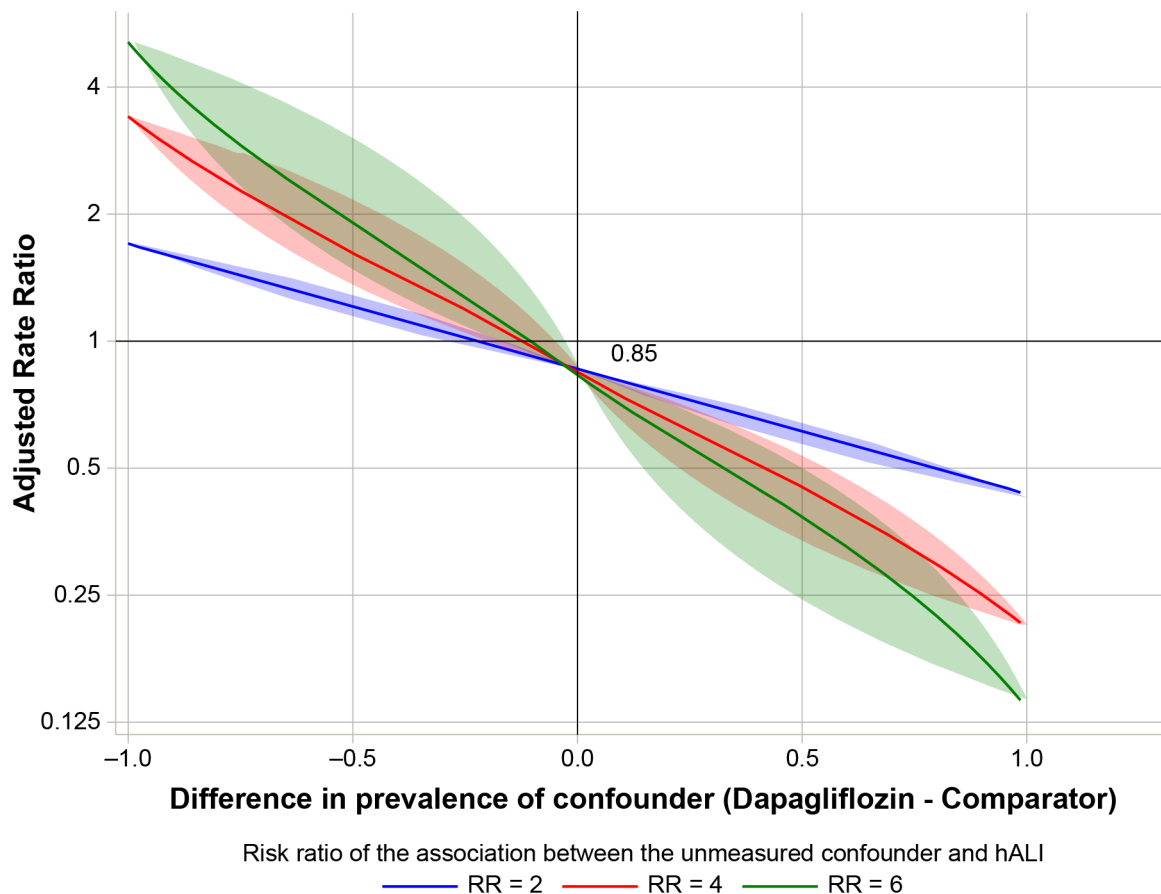

hALI = hospitalization for acute liver injury (the study outcome); RR = risk ratio.

For hALI, the observed IRR estimate in the pooled analysis was 0.85. In the worst-case scenario of having a hypothetical confounder moderately associated with the outcome (risk ratio [RR] = 1.5) in which the treatment groups would be completely imbalanced (i.e., 0% prevalence in the dapagliflozin group and 100% prevalence in the comparator GLD group), the maximum true hALI IRR would be 1.28; any imbalance less extreme would result in IRRs lower than 1.28. A hypothetical moderate confounder (RR = 1.5) would require an imbalance of at least approximately -40% (i.e., higher prevalence in the comparator GLD group) to mask a true IRR greater than 1.0. If the hypothetical unmeasured confounder had a stronger independent relationship with the outcome, RR = 3.0 or 4.5, then a smaller imbalance would be required to mask a true hALI IRR greater than 1.0.

For context, in the overall CPRD population, current smoker status has an imbalance of only -1.3% (15.6% in dapagliflozin users, 16.9% in comparator GLD users) in the full sample (i.e.,

before propensity score trimming). Although smoking status was not measured in the HIRD or Medicare, related variables such as chronic obstructive pulmonary disease (COPD), which may be correlated with smoking status, were included. Smoking is a risk factor for liver disease among patients with type 2 diabetes mellitus (T2DM), with a reported adjusted HR with severe liver disease of 1.58 (95% CI, 1.35-1.86) [4]. Similarly, male sex and hypertension have been reported to be associated with increased acute liver injury risk in patients with T2DM, but adjusted HRs for both are below 1.50 [4]. However, in all three data sources, the imbalance of sex was approximately 1% or less in the present study, and hypertension had an imbalance of less than 6% in all databases in the full sample.

Some individual medications are highly associated with drug-induced liver injury. However, the use of many of the medications with known associations with acute liver injury collected in this study was generally very low (except for the notable exceptions of acetaminophen, NSAIDs [nonsteroidal anti-inflammatory drugs], omeprazole, and statins), and the balance of these variables was very good between treatment groups in the full sample. In all data sources, imbalances in the dapagliflozin group versus the comparator GLD group were generally less than 2% for all medications except for statins in the HIRD (57.3% vs. 53.0%) and lisinopril in Medicare (30.2% vs. 34.0%).

It is not anticipated that a common, moderate or strong confounder would be unmeasured and imbalanced enough and uncorrelated with measured, included covariates to mask a true harmful association of hALI with dapagliflozin.

1.4.2 Severe Complications of Urinary Tract Infection

Figure S8. Sensitivity Analysis, Adjusted Incidence Rate Ratios for sUTI Under Varying Assumptions of Unmeasured Confounding Compared With the Observed Incidence Rate Ratio Estimate From the Pooled Analysis, by Sex

Females

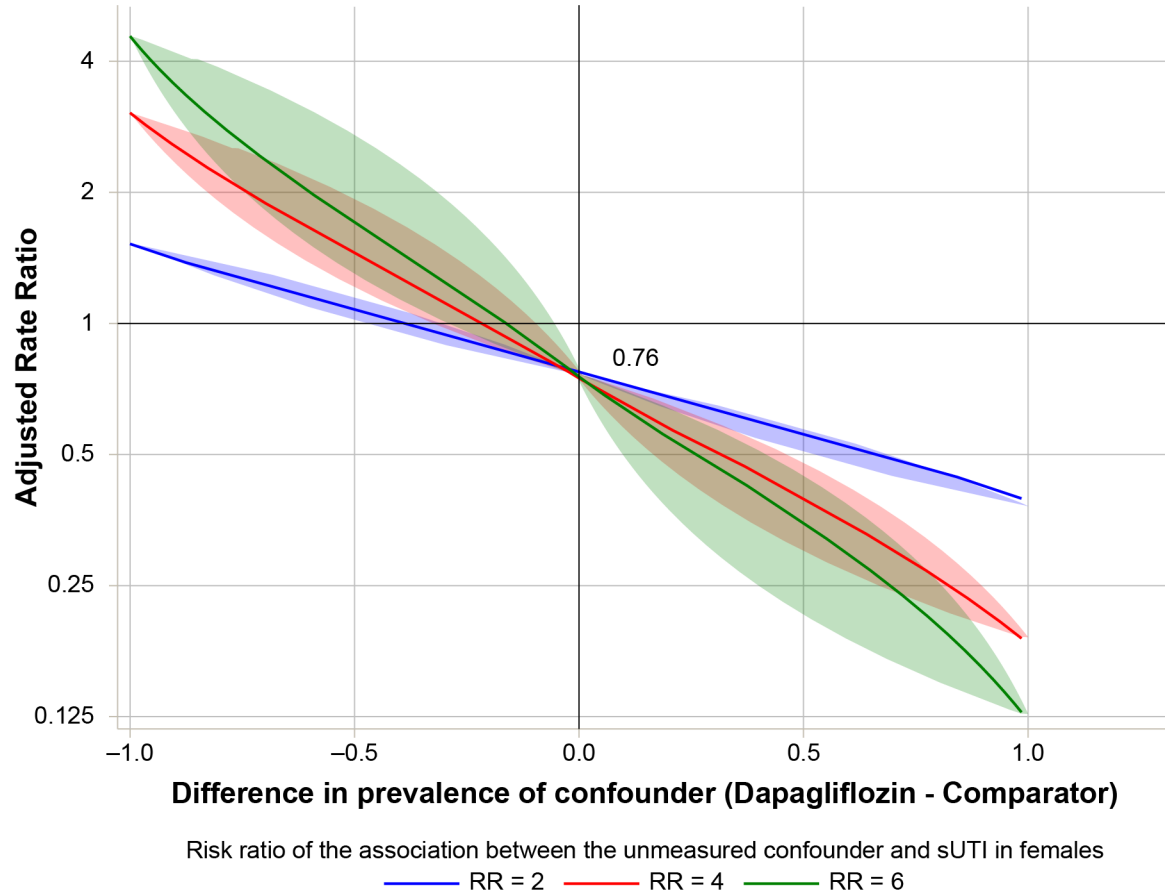



## Males

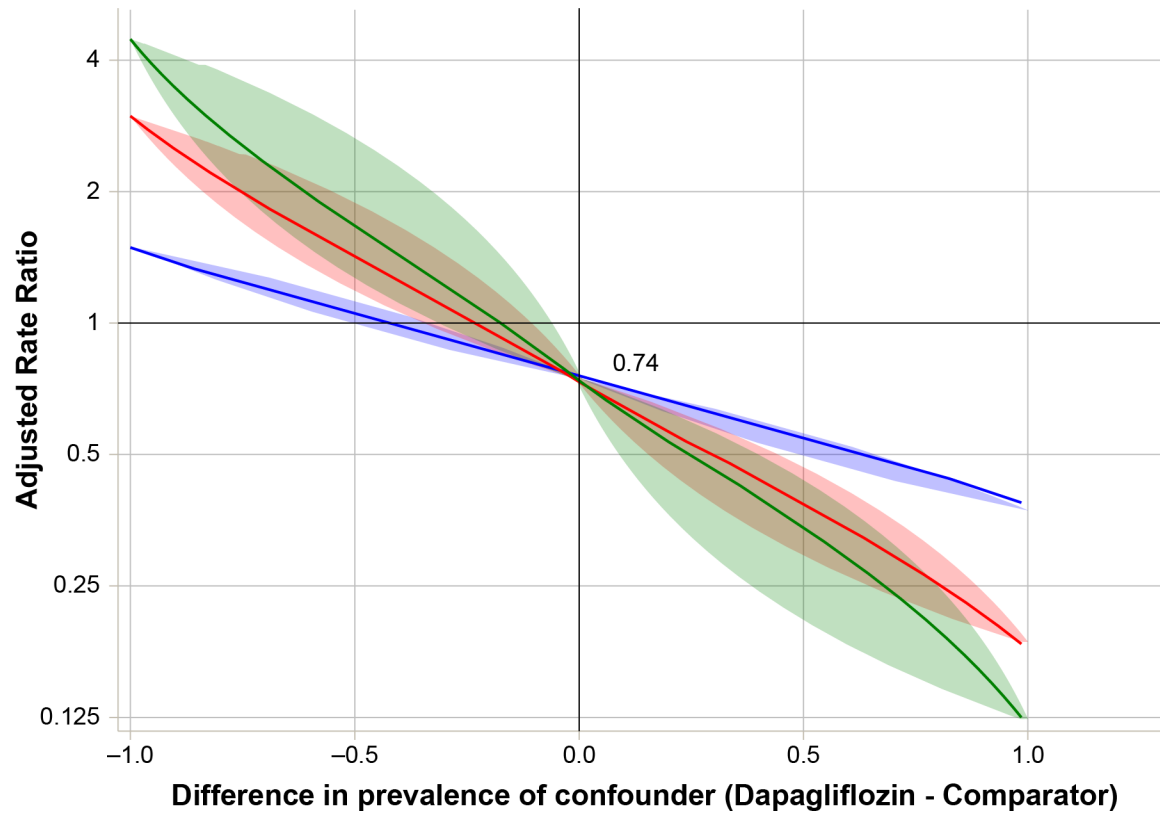

RR = risk ratio; sUTI = hospitalization or emergency department visit for severe complications of urinary tract infection.

For sUTI, the observed IRR estimates in the pooled analyses were 0.76 for females and 0.74 for males. In the worst-case scenario of having a hypothetical confounder moderately associated with the outcome (RR = 1.5) in which groups would be completely imbalanced (0% prevalence in the dapagliflozin group and 100% prevalence in the comparator GLD group), the maximum true sUTI IRR would be 1.05; any imbalance less extreme would result in IRRs lower than 1.05. A hypothetical moderate confounder (RR = 1.5) would require an imbalance of at least approximately -70% (i.e., higher prevalence in the comparator GLD group) among males or females to mask a true sUTI IRR greater than 1.0. If the hypothetical unmeasured confounder had a stronger, independent relationship with the outcome, RR = 3.0 or 4.5, then a smaller imbalance would be required.

For context, an unrelated study reported risk factors associated with pyelonephritis in a population of otherwise healthy women; risk factors included use of antibiotics in the past 30 days, with an odds ratio of 2.1 (95% CI, 1.3-3.4), and current smoking, with an odds ratio of 1.8 (95% CI, 1.3-2.4) [5]. In the current study, antibiotic use had an imbalance of -2.3% in CPRD, -0.5% in the HIRD, and 0.6% in Medicare in the full samples. Similarly, in CPRD, current smoker status had an imbalance of -2.3%. Hypertension, body mass index greater than

30 kg/m<sup>2</sup>, and nephropathy have been reported as risk factors for urinary tract infection (not necessarily severe complications) among patients with T2DM, although all with RRs of 1.42 or less [6]. Some specific factors may be much more strongly associated with sUTI; among females, some sexual behaviors were associated with pyelonephritis, with odds ratios as high as 7.6 for ever versus never having sexual intercourse [5], and among patients admitted to an emergency department, use of an indwelling catheter was associated with bacteremic urinary tract infection (RR = 3.3) [7].

It is not anticipated that a common, moderate or strong confounder would be unmeasured and imbalanced enough and uncorrelated with measured, included covariates to mask a true harmful association of sUTI with dapagliflozin.

## 1.5 Definitions for Index Therapy Type Categories

The frequency distributions of the index therapy type in the full samples (i.e., before propensity score trimming) and in the propensity score-trimmed samples are presented, respectively, in Table 3 (main manuscript) and Table S3 for hALI and in Table 5 (main manuscript) and Table S5 for sUTI. The index medication could be initiated as monotherapy, added to another GLD, switched from another GLD to the index medication, or initiated as index combined therapy (more than one drug was initiated on the index date). For creation of the index therapy type categories, three intervals of time were considered: *interval 1* = the 90 days before (and not including) the index date; *interval 2* = study drug index date; *interval 3* = the 90 days after (and not including) the index date.

The following categories of index medication exposure were created based on individual drugs (i.e., the drug substance), not by drug class:

*Index monotherapy with no prior treatment.* Only a single index drug substance was prescribed or dispensed on the index date (interval 2), and there was no prescription or dispensing for a GLD or insulin in interval 1. Note that interval 3 could be less than 90 days and the definition of index monotherapy would still apply.

*Index combined therapy with no prior treatment.* Multiple drug substances were prescribed or dispensed at interval 2, and there was no prescription or dispensing for any GLD or insulin in interval 1. Note that interval 3 could be less than 90 days and the definition of index combined therapy would still apply.

*Add-on index therapy.* A GLD or insulin other than the index medication was prescribed or dispensed during interval 1, and then a subsequent prescription or dispensing for the same drug substance was identified during interval 2 or 3. If multiple drug substances were identified during interval 1, then *all* these drug substances would need a new prescription or dispensing during interval 2 or 3 to fit this category.

*Switched-to index therapy.* A drug substance(s) other than the index GLD was prescribed or dispensed during interval 1 and had no subsequent prescriptions or dispensings during intervals 2 and 3. If multiple drug substances were identified in interval 1, no additional prescriptions or dispensings for any of these substances could occur in intervals 2 and 3.

*Add-on and switched-to index therapy.* A patient had multiple drug substances with a reported prescription or dispensing in interval 1 and the following two criteria were met:

- At least one drug substance had a prescription or dispensing during interval 2 or interval 3.
- At least one drug substance had no prescription or dispensing during interval 2 and interval 3.

*Non-evaluable index treatment.* A drug substance(s) was prescribed or dispensed during interval 1 and the patient had less than 90 days of follow-up; therefore, it could not be determined if there was an add-on or a switch or both. Note that an outcome of interest was not allowed to truncate the patient's record for the assignment of medication type.

## 2 References

1. Rothman K, Greenland, S., & Lash, TL. Modern Epidemiology. 3rd ed. Philadelphia: Lippincott Williams & Wilkins; 2008.
2. Higgins J, Thomas J, Chandler J, Cumpston M, Li T, Page M, et al. Cochrane handbook for systematic reviews of interventions, version 6.0. July 2019. <https://training.cochrane.org/handbook/>. Accessed 12 August 2020.
3. Lash TL, Fox MP, Fink AK. Unmeasured and unknown confounders. In: Applying Quantitative Bias Analysis to Epidemiologic Data. New York, New York: Springer Science and Business Media, LLC; 2009. p. 59-78.
4. Bjorkstrom K, Franzen S, Eliasson B, Miftaraj M, Gudbjornsdottir S, Trolle-Lagerros Y, et al. Risk factors for severe liver disease in patients with type 2 diabetes. Clin Gastroenterol Hepatol. 2019 Dec;17(13):2769-75 e4. doi:<http://dx.doi.org/10.1016/j.cgh.2019.04.038>.
5. Scholes D, Hooton TM, Roberts PL, Gupta K, Stapleton AE, Stamm WE. Risk factors associated with acute pyelonephritis in healthy women. Ann Intern Med. 2005 Jan 4;142(1):20-7. doi:<http://dx.doi.org/10.7326/0003-4819-142-1-200501040-00008>.
6. Nitzan O, Elias M, Chazan B, Saliba W. Urinary tract infections in patients with type 2 diabetes mellitus: review of prevalence, diagnosis, and management. Diabetes Metab Syndr Obes. 2015;8:129-36. doi:<http://dx.doi.org/10.2147/DMSO.S51792>.
7. Peach BC, Garvan GJ, Garvan CS, Cimiotti JP. Risk factors for urosepsis in older adults: a systematic review. Gerontol Geriatr Med. 2016 Jan-Dec;2:2333721416638980. doi:<http://dx.doi.org/10.1177/2333721416638980>.
